# Supplementary material
Source: publisher site journal article supplement (https://www.spandidos-publications.com/596/downloadSupplementary)
Supplement: Supplementary file 1 [file downloadSupplementary]

## Sheet: R0 Specific Genes
Table SIII-A DAVID_GO_BP for DEGs in KYSE-180 (R0) cancer cells (P<0.05).
Category	Term		-log(pvalue)	PValue	Genes	List Total	Pop Hits	Pop Total	Fold Enrichment	Bonferroni	Benjamini	FDR
GOTERM_BP_FAT	GO:0009725	response to hormone stimulus	7.40205	3.96231e-08	PPARA, PTGS1, FOXO4, GHRHR, PRSS8, FOS, PCSK9, IDH1, SH2B2, CD24, THBS1, INSR, GNG7, GHR, TXNIP, BMP4, WDTC1, EGR2, RXRA, IGF2, PTPRU, MMP14, JUNB, ABCG1, SREBF2, CDKN1A, KRT19, BTG2, DUSP1, CCND2, ARSA, TGFBR3, SORT1, PTCH1, RGS9, IGFBP2, BMP7, VLDLR	507	367	13528	2.76276	0.00010456	0.00010456	7.03294e-05
GOTERM_BP_FAT	GO:0009719	response to endogenous stimulus	7.22795	5.91626e-08	PPARA, PTGS1, HMGCS1, UROS, FOXO4, GHRHR, PRSS8, FOS, PCSK9, IDH1, SH2B2, CD24, THBS1, INSR, GNG7, GHR, TXNIP, BMP4, WDTC1, EGR2, RXRA, IGF2, PTPRU, MMP14, JUNB, ABCG1, SREBF2, CDKN1A, KRT19, BTG2, DUSP1, CCND2, ARSA, TGFBR3, SORT1, PTCH1, RGS9, IGFBP2, BMP7, VLDLR	507	405	13528	2.6353	0.000156118	7.80621e-05	0.000105011
GOTERM_BP_FAT	GO:0048545	response to steroid hormone stimulus	6.08699	8.18488e-07	TXNIP, BMP4, RXRA, PTGS1, PTPRU, MMP14, JUNB, GHRHR, PRSS8, FOS, KRT19, CDKN1A, DUSP1, CCND2, ARSA, IDH1, PTCH1, RGS9, CD24, BMP7, IGFBP2, THBS1, INSR, GHR	507	192	13528	3.33531	0.00215766	0.000719738	0.00145277
GOTERM_BP_FAT	GO:0009612	response to mechanical stimulus	6.08664	8.19135e-07	TXNIP, BMP4, MMP14, JUNB, FOXP2, FOS, SLC1A3, BTG2, FYN, JUN, TRPV4, PTCH1, IGFBP2	507	56	13528	6.19414	0.00215936	0.000540279	0.00145392
GOTERM_BP_FAT	GO:0008203	cholesterol metabolic process	5.1209	7.57008e-06	SREBF1, OSBPL5, RXRA, SORL1, FDXR, HMGCS1, LSS, ABCA1, ABCG1, SREBF2, CYP7B1, APOE, INSIG1, PCSK9, VLDLR	507	92	13528	4.3504	0.0197793	0.00398753	0.0134357
GOTERM_BP_FAT	GO:0010033	response to organic substance	5.07694	8.37651e-06	PPARA, PTGS1, FOXO4, GHRHR, FOS, APOE, INSR, GNG7, GHR, CYR61, EGR1, EGR2, RXRA, LEF1, PTPRU, MMP14, JUNB, ACVR2B, KRT19, BTG2, CCND2, JUN, SORT1, HMGCS1, UROS, CDH1, TTC3, PRSS8, COL6A2, PCSK9, IDH1, SH2B2, CD24, THBS1, BMP4, TXNIP, WDTC1, CFB, IGF2, ABCG1, SREBF2, CYP7B1, CDKN1A, DUSP1, FYN, ARSA, TGFBR3, PTCH1, RGS9, BMP7, IGFBP2, VLDLR	507	721	13528	1.92439	0.0218632	0.00367751	0.0148669
GOTERM_BP_FAT	GO:0048729	tissue morphogenesis	4.87494	1.33372e-05	BMP4, RET, TNNC1, RXRA, BMPR2, LEF1, JAG1, PDX1, FZD6, ATP7A, TNNT2, WNT4, GPC3, LY6E, FREM2, TGFBR3, PBX1, PTCH1, NGFR, BMP7, EXT2	507	180	13528	3.11295	0.0345848	0.00501552	0.0236703
GOTERM_BP_FAT	GO:0007167	enzyme linked receptor protein signaling pathway	4.87444	1.33525e-05	FGFR2, FGF18, FUT8, BMPR2, FOXO4, IL31RA, FOS, CTGF, MAP3K1, SH2B2, EGF, INSR, GNG7, GHR, TXNIP, BMP4, RET, EFNB3, FLT4, ARID5B, IGF2, PTPRU, ACVR2B, JUN, HIPK2, SORT1, TGFBR3, PPM1L, BAMBI, BMP7, BMP6	507	342	13528	2.41858	0.034624	0.00439501	0.0236976
GOTERM_BP_FAT	GO:0043627	response to estrogen stimulus	4.45183	3.53321e-05	BMP4, TXNIP, MMP14, GHRHR, KRT19, DUSP1, CCND2, ARSA, PTCH1, RGS9, CD24, IGFBP2, BMP7, INSR, GHR	507	105	13528	3.81178	0.0890279	0.00928096	0.0626944
GOTERM_BP_FAT	GO:0043434	response to peptide hormone stimulus	4.19592	6.36912e-05	PPARA, WDTC1, EGR2, RXRA, IGF2, FOXO4, JUNB, GHRHR, PRSS8, BTG2, CCND2, PCSK9, SORT1, SH2B2, BMP7, INSR, VLDLR, GHR	507	154	13528	3.11873	0.154719	0.0151644	0.112989
GOTERM_BP_FAT	GO:0031960	response to corticosteroid stimulus	4.14233	7.20564e-05	PRSS8, BMP4, FOS, CDKN1A, DUSP1, RXRA, PTGS1, PTPRU, IGFBP2, INSR, JUNB, GHRHR, GHR	507	85	13528	4.08084	0.173176	0.0157221	0.12782
GOTERM_BP_FAT	GO:0009991	response to extracellular stimulus	4.09801	7.97971e-05	SREBF1, BMP4, PPARA, CFB, RXRA, BMPR2, AQP3, FOS, CDKN1A, DUSP1, JUN, LIPG, ARSA, CTSD, PCSK9, PTCH1, ALOX5, BMP7, IGFBP2, INSR, VLDLR, GHR	507	220	13528	2.66824	0.189896	0.0160689	0.141542
GOTERM_BP_FAT	GO:0010035	response to inorganic substance	4.06125	8.68453e-05	TXNIP, TNNC1, RXRA, UROS, LEF1, AQP3, SREBF2, ATP7A, TNNT2, FOS, CDKN1A, SLC1A3, NPTXR, DUSP1, APOE, JUN, CYBRD1, CACNA1G, THBS1, IGFBP2, INSR	507	205	13528	2.73332	0.204826	0.0162378	0.154035
GOTERM_BP_FAT	GO:0032868	response to insulin stimulus	4.05943	8.72107e-05	PPARA, WDTC1, EGR2, RXRA, IGF2, FOXO4, GHRHR, CCND2, PCSK9, SORT1, SH2B2, INSR, VLDLR, GHR	507	100	13528	3.73554	0.205593	0.0152268	0.154682
GOTERM_BP_FAT	GO:0032870	cellular response to hormone stimulus	3.87486	0.000133395	WDTC1, RXRA, IGF2, FOXO4, GHRHR, JUNB, FOS, DUSP1, CCND2, PCSK9, SH2B2, IGFBP2, INSR, GNG7, VLDLR, GHR	507	133	13528	3.20992	0.296757	0.021763	0.236506
GOTERM_BP_FAT	GO:0051384	response to glucocorticoid stimulus	3.83956	0.00014469	BMP4, FOS, CDKN1A, DUSP1, RXRA, PTGS1, PTPRU, IGFBP2, INSR, GHRHR, JUNB, GHR	507	78	13528	4.10499	0.317413	0.0222123	0.256508
GOTERM_BP_FAT	GO:0031667	response to nutrient levels	3.82143	0.000150859	SREBF1, BMP4, PPARA, CFB, RXRA, BMPR2, AQP3, DUSP1, JUN, LIPG, ARSA, CTSD, PCSK9, PTCH1, ALOX5, BMP7, IGFBP2, INSR, VLDLR, GHR	507	197	13528	2.70888	0.328437	0.0218765	0.267431
GOTERM_BP_FAT	GO:0015914	phospholipid transport	3.74471	0.000180006	APOE, ATP9A, ATP8A2, ATP8B2, ABCA1, ABCG1, ATP8B3, ATP8A1	507	33	13528	6.46847	0.378164	0.0246941	0.319022
GOTERM_BP_FAT	GO:0060348	bone development	3.6967	0.000201046	BMP4, FGF18, MINPP1, IGF2, MMP14, COL5A2, CTSK, SOST, CTGF, SORT1, AXIN2, BMP7, EXT2, GHR, BMP6	507	123	13528	3.25396	0.411757	0.0261819	0.356249
GOTERM_BP_FAT	GO:0032869	cellular response to insulin stimulus	3.69309	0.000202728	WDTC1, CCND2, RXRA, PCSK9, SH2B2, IGF2, FOXO4, INSR, GHRHR, GHR, VLDLR	507	68	13528	4.31628	0.414362	0.0251569	0.359223
GOTERM_BP_FAT	GO:0035295	tube development	3.64394	0.000227018	BMP4, WNT5A, FGF18, RET, BMPR2, MMP14, FOXP1, FZD6, FOXP2, HES1, ATP7A, TNS3, ACVR2B, WNT4, GPC3, CTGF, PBX1, PTCH1, BMP7, EGF, CYR61	507	220	13528	2.54696	0.450732	0.0268675	0.402183
GOTERM_BP_FAT	GO:0006869	lipid transport	3.4597	0.000346976	OSBPL5, PPARA, GM2A, SORL1, ABCA1, ABCG1, SLC25A20, STARD4, APOE, ATP9A, ATP8A2, LIPG, ATP8B2, ATP8B3, VLDLR, ATP8A1	507	145	13528	2.94427	0.599815	0.0390363	0.614082
GOTERM_BP_FAT	GO:0001503	ossification	3.44356	0.000360112	BMP4, FGF18, MINPP1, IGF2, MMP14, COL5A2, CTSK, SOST, CTGF, SORT1, AXIN2, BMP7, EXT2, BMP6	507	115	13528	3.2483	0.613454	0.0388304	0.637259
GOTERM_BP_FAT	GO:0010942	positive regulation of cell death	3.34955	0.000447147	ING4, CADM1, APH1B, SFN, APOE, MAP3K1, PCSK9, CD24, FGD3, MAP2K6, TXNIP, BMP4, FOXL2, ABR, VAV3, ARHGEF6, RXRA, NR4A1, ARHGEF9, ARHGEF12, NLRP1, CDKN1A, TNFSF10, CSRNP3, DUSP1, JUN, HIPK2, SORT1, NGFR, BMP7, SCAND1, PRODH	507	435	13528	1.96285	0.692808	0.0461142	0.790701
GOTERM_BP_FAT	GO:0016055	Wnt receptor signaling pathway	3.34327	0.000453656	WNT5A, WNT10A, LEF1, CELSR2, PTPRU, CALCOCO1, FZD7, FZD6, CPZ, WNT4, SFRP1, WNT11, CD24, AXIN2, WNT6	507	133	13528	3.0093	0.698042	0.045012	0.802168
GOTERM_BP_FAT	GO:0007178	transmembrane receptor protein serine/threonine kinase signaling pathway	3.34121	0.000455813	BMP4, FOS, ACVR2B, FUT8, JUN, MAP3K1, HIPK2, BMPR2, TGFBR3, PPM1L, BAMBI, BMP7, BMP6	507	103	13528	3.36769	0.699757	0.0435833	0.805968
GOTERM_BP_FAT	GO:0022610	biological adhesion	3.28801	0.000515214	CADM1, TLN2, CLDN3, CLSTN3, CDH1, SPOCK1, NEO1, NRCAM, CDH8, LGALS3BP, ANXA9, CTGF, ROPN1B, COL6A2, CNTNAP2, ESAM, CD24, THBS1, CDH24, APBA1, CYR61, FN1, FLRT3, RET, HAPLN3, NFASC, SDK1, PTPRS, LEF1, CELSR2, PTPRU, COL5A1, COL4A6, CLDN23, HES1, LAMA2, TMEM8B, LAMC3, FREM2, CDH18, CDON, CYFIP2, FBLN7, ADAM22, EDA	507	701	13528	1.71285	0.74334	0.0474107	0.910549
GOTERM_BP_FAT	GO:0007155	cell adhesion	3.28688	0.000516555	CADM1, TLN2, CLDN3, CLSTN3, CDH1, SPOCK1, NEO1, NRCAM, CDH8, LGALS3BP, ANXA9, CTGF, ROPN1B, COL6A2, CNTNAP2, ESAM, CD24, THBS1, CDH24, APBA1, CYR61, FN1, FLRT3, RET, HAPLN3, NFASC, SDK1, PTPRS, LEF1, CELSR2, PTPRU, COL5A1, COL4A6, CLDN23, HES1, LAMA2, TMEM8B, LAMC3, FREM2, CDH18, CDON, CYFIP2, FBLN7, ADAM22, EDA	507	700	13528	1.7153	0.744246	0.0459304	0.912908
GOTERM_BP_FAT	GO:0042127	regulation of cell proliferation	3.26148	0.000547674	FGFR2, ING4, FGF18, FRK, PTGS1, BMPR2, PDX1, JAG1, SFN, FOXO4, GHRHR, ARNT, IL31RA, GPC3, APOE, CD24, AXIN2, THBS1, EGF, INSR, TXNIP, BMP4, EGR4, CRIP2, RXRA, FLT4, IGF2, PTPRU, VASH2, FOXP1, FOXP2, MXD4, HES1, TNS3, CDKN1A, BTG2, CCND2, JUN, GRN, HIPK2, ATP8A2, TGFBR3, SP6, PBX1, PTCH1, NGFR, BMP7, NR5A2, SCAND1	507	787	13528	1.6613	0.76442	0.0470475	0.967652
GOTERM_BP_FAT	GO:0043588	skin development	3.21761	0.000605889	ATP7A, LEF1, SFN, NGFR, EDA, COL5A2, COL5A1	507	29	13528	6.44059	0.797988	0.050286	1.06999
GOTERM_BP_FAT	GO:0006897	endocytosis	3.21275	0.000612696	SH3GL3, STON2, ARC, STON1, MYO7A, SORL1, MRC2, ABCA1, DAB2, PACSIN1, LRP1, APOE, FOLR1, PIKFYVE, SORT1, CD24, THBS1, CLCN5, VLDLR, GHR	507	220	13528	2.42568	0.801586	0.0492877	1.08195
GOTERM_BP_FAT	GO:0010324	membrane invagination	3.21275	0.000612696	SH3GL3, STON2, ARC, STON1, MYO7A, SORL1, MRC2, ABCA1, DAB2, PACSIN1, LRP1, APOE, FOLR1, PIKFYVE, SORT1, CD24, THBS1, CLCN5, VLDLR, GHR	507	220	13528	2.42568	0.801586	0.0492877	1.08195
GOTERM_BP_FAT	GO:0045944	positive regulation of transcription from RNA polymerase II promoter	3.12165	0.000755706	PPARA, ABLIM2, PDX1, CALCOCO1, ARNT, FOS, MEIS2, MAP3K1, NFATC2, EGR1, BMP4, SREBF1, FOXL2, EGR2, LMX1B, RXRA, NR4A1, LEF1, JUNB, SREBF2, HES1, CSRNP3, JUN, HIPK2, PBX1, NR5A2, BMP7, BMP6	507	371	13528	2.01377	0.863995	0.0586652	1.33289
GOTERM_BP_FAT	GO:0043065	positive regulation of apoptosis	3.10342	0.000788105	ING4, CADM1, APH1B, SFN, APOE, MAP3K1, PCSK9, CD24, MAP2K6, FGD3, TXNIP, FOXL2, ABR, VAV3, ARHGEF6, RXRA, NR4A1, ARHGEF9, ARHGEF12, NLRP1, CDKN1A, TNFSF10, CSRNP3, DUSP1, JUN, HIPK2, SORT1, NGFR, BMP7, SCAND1, PRODH	507	430	13528	1.92362	0.875148	0.0593602	1.38966
GOTERM_BP_FAT	GO:0010876	lipid localization	3.09376	0.000805825	OSBPL5, PPARA, GM2A, SORL1, ABCA1, ABCG1, SLC25A20, STARD4, APOE, ATP9A, ATP8A2, LIPG, ATP8B2, ATP8B3, VLDLR, ATP8A1	507	157	13528	2.71923	0.880857	0.0589732	1.42069
GOTERM_BP_FAT	GO:0032355	response to estradiol stimulus	3.08173	0.000828457	TXNIP, BMP4, DUSP1, CCND2, PTCH1, BMP7, IGFBP2, INSR, GHR	507	54	13528	4.44707	0.88777	0.0589469	1.46032
GOTERM_BP_FAT	GO:0000904	cell morphogenesis involved in differentiation	3.06529	0.000860427	EGR2, EFNB3, RXRA, MYO7A, KIF5C, NFASC, LEF1, CELSR2, SLIT3, NRCAM, HES1, DAB2, SEMA6C, SLC1A3, UNC5B, ANK3, TGFBR3, SEMA3A, NGFR, BMP7, FN1	507	244	13528	2.29644	0.896858	0.0595491	1.51627
GOTERM_BP_FAT	GO:0043068	positive regulation of programmed cell death	3.05514	0.000880775	ING4, CADM1, APH1B, SFN, APOE, MAP3K1, PCSK9, CD24, MAP2K6, FGD3, TXNIP, FOXL2, ABR, VAV3, ARHGEF6, RXRA, NR4A1, ARHGEF9, ARHGEF12, NLRP1, CDKN1A, TNFSF10, CSRNP3, DUSP1, JUN, HIPK2, SORT1, NGFR, BMP7, SCAND1, PRODH	507	433	13528	1.91029	0.902255	0.0593597	1.55186
GOTERM_BP_FAT	GO:0006928	cell motion	3.01773	0.000959992	FUT8, SPOCK1, MYLIP, NRCAM, UNC5B, CTGF, ANK3, ROPN1B, CD24, SEMA3A, THBS1, FN1, RET, VAV3, EGR2, LMX1B, EFNB3, PLXNB1, ARID5B, PODXL, KIF5C, NFASC, MMP14, COL5A1, SLIT3, LSP1, TNS3, TNS1, SEMA6C, FYN, TGFBR3, NGFR, BMP7	507	475	13528	1.85373	0.920709	0.0629238	1.69032
GOTERM_BP_FAT	GO:0030182	neuron differentiation	2.97556	0.0010579	MYO7A, CDH1, JAG1, NRCAM, GPC2, SLC1A3, UNC5B, ANK3, PCSK9, CNTNAP2, CD24, SEMA3A, BMP4, DFNA5, RET, EGR2, LMX1B, EFNB3, RXRA, KIF5C, NFASC, CELSR2, SLIT3, HES1, ATP7A, SEMA6C, BTG2, MAP2, PHGDH, NGFR, BMP7	507	438	13528	1.88848	0.938779	0.0674491	1.86118
GOTERM_BP_FAT	GO:0010038	response to metal ion	2.96638	0.0010805	TXNIP, TNNC1, RXRA, LEF1, AQP3, SREBF2, ATP7A, TNNT2, DUSP1, CYBRD1, CACNA1G, THBS1, IGFBP2, INSR	507	129	13528	2.89577	0.942327	0.0672188	1.90058
GOTERM_BP_FAT	GO:0016044	membrane organization	2.94779	0.00112775	STON2, STON1, MYO7A, SORL1, ABCA1, NRCAM, PACSIN1, DAB2, APOE, ROPN1B, FOLR1, SERPINA5, PIKFYVE, CD24, THBS1, ATP8B3, GHR, SH3GL3, ARC, VAV3, MRC2, REEP1, COL5A1, LRP1, PLSCR4, SORT1, VLDLR, CLCN5	507	381	13528	1.96091	0.949096	0.0684452	1.98292
GOTERM_BP_FAT	GO:0030324	lung development	2.93579	0.00115933	WNT5A, ATP7A, HES1, BMP4, TNS3, FGF18, ACVR2B, CTGF, BMPR2, MMP14, FOXP1, FOXP2	507	99	13528	3.23424	0.953171	0.0687169	2.03791
GOTERM_BP_FAT	GO:0045596	negative regulation of cell differentiation	2.89507	0.00127329	BMP4, ZFP36, PPARA, ABCA1, JAG1, FOXO4, TTC3, CD74, ABCG1, HES1, WNT4, PRDM6, TGFBR3, PBX1, SEMA3A, CD24, NGFR, AXIN2, BMP7	507	216	13528	2.34707	0.965347	0.0735705	2.2361
GOTERM_BP_FAT	GO:0035265	organ growth	2.84305	0.00143534	ACVR2B, LMX1B, LY6E, RXRA, TGFBR3	507	14	13528	9.52944	0.977417	0.0807848	2.51727
GOTERM_BP_FAT	GO:0030323	respiratory tube development	2.82908	0.00148225	WNT5A, ATP7A, HES1, BMP4, TNS3, FGF18, ACVR2B, CTGF, BMPR2, MMP14, FOXP1, FOXP2	507	102	13528	3.13911	0.980051	0.0815786	2.59852
GOTERM_BP_FAT	GO:0000165	MAPKKK cascade	2.82402	0.00149962	WNT5A, RET, ARHGEF6, MAP4K1, IGF2, MAPK10, CD74, IL31RA, DUSP19, DUSP2, MAP3K1, PPM1L, EGF, THBS1, INSR, MAP2K6, GHR	507	184	13528	2.46523	0.980946	0.0808125	2.62859
GOTERM_BP_FAT	GO:0008202	steroid metabolic process	2.81081	0.00154595	SREBF1, OSBPL5, RXRA, SORL1, HMGCS1, FDXR, SULT2B1, LSS, ABCA1, ABCG1, SREBF2, CYP7B1, APOE, INSIG1, PCSK9, PBX1, NR5A2, VLDLR	507	202	13528	2.37764	0.983142	0.0815434	2.70875
GOTERM_BP_FAT	GO:0048666	neuron development	2.67485	0.00211424	RET, EGR2, EFNB3, LMX1B, RXRA, MYO7A, KIF5C, NFASC, CDH1, CELSR2, SLIT3, NRCAM, ATP7A, HES1, SEMA6C, SLC1A3, UNC5B, ANK3, MAP2, PHGDH, CNTNAP2, SEMA3A, CD24, NGFR, BMP7	507	339	13528	1.96773	0.996248	0.107731	3.68697
GOTERM_BP_FAT	GO:0060541	respiratory system development	2.62901	0.00234956	WNT5A, ATP7A, HES1, BMP4, TNS3, FGF18, ACVR2B, CTGF, BMPR2, MMP14, FOXP1, FOXP2	507	108	13528	2.96472	0.997986	0.116758	4.08932
GOTERM_BP_FAT	GO:0030278	regulation of ossification	2.60966	0.00245661	BMP4, ACVR2B, SOST, EGR2, SFRP1, BMPR2, PBX1, AXIN2, BMP7, BMP6	507	78	13528	3.42083	0.998483	0.119508	4.27182
GOTERM_BP_FAT	GO:0055092	sterol homeostasis	2.57685	0.00264941	APOE, LIPG, PCSK9, ABCA1, CD24, NR5A2, ABCG1	507	38	13528	4.91519	0.999089	0.125966	4.59969
GOTERM_BP_FAT	GO:0042632	cholesterol homeostasis	2.57685	0.00264941	APOE, LIPG, PCSK9, ABCA1, CD24, NR5A2, ABCG1	507	38	13528	4.91519	0.999089	0.125966	4.59969
GOTERM_BP_FAT	GO:0055088	lipid homeostasis	2.56363	0.00273128	APOE, LIPG, PCSK9, IGF2, ABCA1, CD24, NR5A2, ABCG1	507	51	13528	4.18548	0.999267	0.127317	4.73859
GOTERM_BP_FAT	GO:0044057	regulation of system process	2.52683	0.00297285	EGR1, ARC, EGR2, LZTS1, TNNC1, PTGS1, EPHX2, BMPR2, IGF2, PXK, LAMA2, TNNT2, ANXA6, TNNT3, ADRB1, SLC1A3, TNNT1, APOE, CACNA1G, SEMA3A, ALOX5, HCN4, SCN5A	507	309	13528	1.98607	0.999613	0.135411	5.14734
GOTERM_BP_FAT	GO:0016485	protein processing	2.5047	0.00312825	CPE, C4A, ATP6AP2, CFB, C4B, APH1B, PCSK9, C1R, SERPING1, PTCH1, MMP14, PCSK6	507	112	13528	2.85883	0.999743	0.13958	5.4094
GOTERM_BP_FAT	GO:0042327	positive regulation of phosphorylation	2.47553	0.0033456	BMP4, CCND2, BMPR2, IGF2, CD24, EGF, BMP7, THBS1, INSR, IL31RA, GHR	507	97	13528	3.02584	0.999856	0.146087	5.7748
GOTERM_BP_FAT	GO:0040007	growth	2.43536	0.00366976	FGFR2, BMP4, HPN, WDTC1, LMX1B, RXRA, FHL1, ARID5B, FOXP2, ACVR2B, LY6E, TGFBR3, SEPP1, BMP7, APBA1, BMP6	507	183	13528	2.33289	0.999939	0.156517	6.31729
GOTERM_BP_FAT	GO:0045935	positive regulation of nucleobase, nucleoside, nucleotide and nucleic acid metabolic process	2.42395	0.00376751	PPARA, ABLIM2, ABCA1, PDX1, FOXO4, CALCOCO1, GHRHR, IL31RA, ARNT, FOS, MEIS2, APOE, MAP3K1, NFATC2, INSR, SREBF1, EGR1, BMP4, FOXL2, EGR2, LMX1B, EGR4, RXRA, LEF1, NR4A1, PRKCG, IGF2, JUNB, SREBF2, HES1, CSRNP3, JUN, DYRK1B, HIPK2, PBX1, BMP7, NR5A2, BMP6	507	624	13528	1.62489	0.999953	0.157806	6.48029
GOTERM_BP_FAT	GO:0030501	positive regulation of bone mineralization	2.40936	0.00389623	BMP4, ACVR2B, BMPR2, BMP7, BMP6	507	18	13528	7.41179	0.999966	0.160219	6.69453
GOTERM_BP_FAT	GO:0040037	negative regulation of fibroblast growth factor receptor signaling pathway	2.3888	0.00408511	WNT4, NGFR, THBS1	507	3	13528	26.6824	0.99998	0.164767	7.00807
GOTERM_BP_FAT	GO:0045937	positive regulation of phosphate metabolic process	2.37981	0.00417053	BMP4, CCND2, BMPR2, IGF2, CD24, EGF, BMP7, THBS1, INSR, IL31RA, GHR	507	100	13528	2.93507	0.999984	0.165401	7.14954
GOTERM_BP_FAT	GO:0010562	positive regulation of phosphorus metabolic process	2.37981	0.00417053	BMP4, CCND2, BMPR2, IGF2, CD24, EGF, BMP7, THBS1, INSR, IL31RA, GHR	507	100	13528	2.93507	0.999984	0.165401	7.14954
GOTERM_BP_FAT	GO:0008219	cell death	2.33148	0.00466147	ING4, CADM1, APH1B, CGB7, SFN, DAPL1, TSC22D3, TNFRSF1B, UNC5B, TRIM69, MAP3K1, CLUL1, CD24, SEMA3A, THBS1, AXIN2, BMF, FGD3, RNF144B, FOXL2, VAV3, ABR, LMX1B, ARHGEF6, CECR2, PRKCG, IGF2, REEP1, ARHGEF9, ARHGEF12, NLRP1, DNASE2, CYP7B1, TNFRSF10C, TNFSF10, CSRNP3, JUN, HIPK2, CYFIP2, CTSD, NGFR, IFI6	507	719	13528	1.55864	0.999996	0.180349	7.95869
GOTERM_BP_FAT	GO:0051605	protein maturation by peptide bond cleavage	2.32182	0.00476634	CPE, C4A, ATP6AP2, CFB, C4B, PCSK9, C1R, SERPING1, MMP14, PCSK6	507	86	13528	3.10261	0.999997	0.181379	8.13066
GOTERM_BP_FAT	GO:0070169	positive regulation of biomineral formation	2.31955	0.00479127	BMP4, ACVR2B, BMPR2, BMP7, BMP6	507	19	13528	7.0217	0.999997	0.179663	8.1715
GOTERM_BP_FAT	GO:0016265	death	2.28431	0.0051963	ING4, CADM1, APH1B, CGB7, SFN, DAPL1, TSC22D3, TNFRSF1B, UNC5B, TRIM69, MAP3K1, CLUL1, CD24, SEMA3A, THBS1, AXIN2, BMF, FGD3, RNF144B, FOXL2, VAV3, ABR, LMX1B, ARHGEF6, CECR2, PRKCG, IGF2, REEP1, ARHGEF9, ARHGEF12, NLRP1, DNASE2, CYP7B1, TNFRSF10C, TNFSF10, CSRNP3, JUN, HIPK2, CYFIP2, CTSD, NGFR, IFI6	507	724	13528	1.54788	0.999999	0.190647	8.83259
GOTERM_BP_FAT	GO:0048667	cell morphogenesis involved in neuron differentiation	2.27238	0.00534099	EGR2, EFNB3, RXRA, MYO7A, KIF5C, NFASC, CELSR2, SLIT3, HES1, NRCAM, SEMA6C, SLC1A3, UNC5B, ANK3, SEMA3A, NGFR, BMP7	507	209	13528	2.17034	0.999999	0.192757	9.06765
GOTERM_BP_FAT	GO:0042692	muscle cell differentiation	2.24847	0.00564329	TNNT2, BMP4, KRT19, WNT4, CDON, DYRK1B, RXRA, SORT1, MYOZ1, JAG1, NEO1, FOXP1	507	121	13528	2.64619	1	0.199811	9.55694
GOTERM_BP_FAT	GO:0014070	response to organic cyclic substance	2.24847	0.00564329	BMP4, FOS, CDKN1A, BTG2, CCND2, JUN, RXRA, LEF1, IDH1, PTCH1, JUNB, GHR	507	121	13528	2.64619	1	0.199811	9.55694
GOTERM_BP_FAT	GO:0051385	response to mineralocorticoid stimulus	2.23548	0.00581465	PRSS8, FOS, CDKN1A, PTGS1, JUNB	507	20	13528	6.67061	1	0.202536	9.83319
GOTERM_BP_FAT	GO:0051604	protein maturation	2.22184	0.00600015	CPE, C4A, ATP6AP2, CFB, C4B, APH1B, PCSK9, C1R, SERPING1, PTCH1, MMP14, PCSK6	507	122	13528	2.6245	1	0.205606	10.1314
GOTERM_BP_FAT	GO:0051173	positive regulation of nitrogen compound metabolic process	2.20329	0.00626199	PPARA, ABLIM2, ABCA1, PDX1, FOXO4, CALCOCO1, GHRHR, IL31RA, ARNT, FOS, MEIS2, APOE, MAP3K1, NFATC2, INSR, SREBF1, EGR1, BMP4, FOXL2, EGR2, LMX1B, EGR4, RXRA, LEF1, NR4A1, PRKCG, IGF2, JUNB, SREBF2, HES1, CSRNP3, JUN, DYRK1B, HIPK2, PBX1, BMP7, NR5A2, BMP6	507	644	13528	1.57443	1	0.210866	10.5506
GOTERM_BP_FAT	GO:0007584	response to nutrient	2.20206	0.00627965	BMP4, DUSP1, CFB, RXRA, LIPG, ARSA, PTCH1, ALOX5, BMP7, IGFBP2, INSR, AQP3, VLDLR	507	140	13528	2.47766	1	0.208752	10.5788
GOTERM_BP_FAT	GO:0007411	axon guidance	2.17254	0.00672142	SEMA6C, EGR2, UNC5B, EFNB3, ANK3, KIF5C, NFASC, SEMA3A, NGFR, BMP7, SLIT3	507	107	13528	2.74306	1	0.219008	11.2818
GOTERM_BP_FAT	GO:0008284	positive regulation of cell proliferation	2.15894	0.00693523	FGFR2, BMP4, FGF18, CRIP2, EGR4, FLT4, IGF2, PDX1, VASH2, FOXP1, GHRHR, FOXP2, IL31RA, ARNT, HES1, TNS3, CDKN1A, CCND2, JUN, GRN, HIPK2, SP6, PBX1, NGFR, CD24, EGF, INSR	507	414	13528	1.74016	1	0.222434	11.6202
GOTERM_BP_FAT	GO:0007223	Wnt receptor signaling pathway, calcium modulating pathway	2.15653	0.00697387	WNT5A, WNT10A, WNT4, WNT11, WNT6	507	21	13528	6.35296	1	0.220868	11.6812
GOTERM_BP_FAT	GO:0045893	positive regulation of transcription, DNA-dependent	2.15365	0.00702027	PPARA, ABLIM2, PDX1, CALCOCO1, IL31RA, ARNT, FOS, MEIS2, MAP3K1, NFATC2, EGR1, BMP4, SREBF1, FOXL2, EGR2, LMX1B, RXRA, LEF1, NR4A1, JUNB, SREBF2, HES1, CSRNP3, JUN, DYRK1B, HIPK2, PBX1, NR5A2, BMP7, BMP6	507	477	13528	1.67814	1	0.219555	11.7544
GOTERM_BP_FAT	GO:0032526	response to retinoic acid	2.14497	0.00716191	BMP4, DUSP1, RXRA, PTCH1, IGFBP2, AQP3	507	33	13528	4.85135	1	0.220874	11.9776
GOTERM_BP_FAT	GO:0003002	regionalization	2.14216	0.0072084	BMP4, ARC, EGR2, LMX1B, BMPR2, LEF1, CELSR2, HES1, ACVR2B, SFRP1, BTG2, HIPK2, PTCH1, PBX1, AXIN2, LFNG	507	197	13528	2.1671	1	0.219598	12.0507
GOTERM_BP_FAT	GO:0031175	neuron projection development	2.11333	0.00770319	EGR2, EFNB3, RXRA, KIF5C, NFASC, CDH1, CELSR2, SLIT3, NRCAM, ATP7A, SEMA6C, UNC5B, ANK3, MAP2, PHGDH, SEMA3A, CD24, NGFR, BMP7	507	256	13528	1.98034	1	0.230207	12.8255
GOTERM_BP_FAT	GO:0032989	cellular component morphogenesis	2.10685	0.00781901	SSH1, MYO7A, NRCAM, DAB2, SLC1A3, UNC5B, ANK3, SEMA3A, FN1, EGR2, EFNB3, RXRA, KIF5C, NFASC, LEF1, CELSR2, MYOZ1, SLIT3, ATP7A, TNNT2, HES1, KRT19, SEMA6C, TGFBR3, NGFR, BMP7	507	397	13528	1.74746	1	0.230659	13.0059
GOTERM_BP_FAT	GO:0051254	positive regulation of RNA metabolic process	2.10418	0.00786723	PPARA, ABLIM2, PDX1, CALCOCO1, IL31RA, ARNT, FOS, MEIS2, MAP3K1, NFATC2, EGR1, BMP4, SREBF1, FOXL2, EGR2, LMX1B, RXRA, LEF1, NR4A1, JUNB, SREBF2, HES1, CSRNP3, JUN, DYRK1B, HIPK2, PBX1, NR5A2, BMP7, BMP6	507	481	13528	1.66419	1	0.22937	13.0809
GOTERM_BP_FAT	GO:0016337	cell-cell adhesion	2.10384	0.0078733	RET, CADM1, CLSTN3, CLDN3, CDH1, CELSR2, PTPRU, CLDN23, CDH8, NRCAM, ANXA9, CTGF, ROPN1B, FREM2, CDH18, COL6A2, CYFIP2, ESAM, CD24, CDH24	507	276	13528	1.93351	1	0.227041	13.0903
GOTERM_BP_FAT	GO:0043062	extracellular structure organization	2.08406	0.00824032	CADM1, LMX1B, ADAMTS14, ELN, NFASC, CDH1, COL5A2, COL5A1, COL4A6, ATP7A, NRCAM, ANK3, COL6A2, CYR61	507	163	13528	2.29174	1	0.233788	13.6592
GOTERM_BP_FAT	GO:0048286	lung alveolus development	2.08218	0.00827604	ATP7A, BMP4, TNS3, BMPR2, FOXP2	507	22	13528	6.06419	1	0.232205	13.7144
GOTERM_BP_FAT	GO:0055010	ventricular cardiac muscle morphogenesis	2.08218	0.00827604	TNNT2, LY6E, TNNC1, RXRA, TGFBR3	507	22	13528	6.06419	1	0.232205	13.7144
GOTERM_BP_FAT	GO:0010721	negative regulation of cell development	2.06521	0.00860575	BMP4, TGFBR3, SEMA3A, NGFR, CD24, BMP7, TTC3	507	48	13528	3.89119	1	0.237791	14.2222
GOTERM_BP_FAT	GO:0001501	skeletal system development	2.05575	0.00879522	BMP4, WNT5A, MINPP1, FGF18, ARID5B, IGF2, EXTL1, MMP14, COL5A2, ATP7A, ACVR2B, CTSK, SOST, CTGF, SORT1, PBX1, AXIN2, BMP7, EXT2, GUSBP3, BMP6, GHR	507	319	13528	1.84017	1	0.239876	14.5127
GOTERM_BP_FAT	GO:0010941	regulation of cell death	2.04756	0.00896276	ING4, CADM1, APH1B, CDH1, SFN, CD74, IL31RA, APOE, MAP3K1, PCSK9, CD24, PCSK6, THBS1, BMF, FGD3, MAP2K6, GHR, NMNAT3, TXNIP, BMP4, FOXL2, VAV3, ABR, ARHGEF6, RXRA, NR4A1, IGF2, ARHGEF9, ARHGEF12, NLRP1, ATP7A, TNFSF10, CDKN1A, BTG2, CSRNP3, SFRP1, DUSP1, JUN, HIPK2, SORT1, NGFR, BMP7, SCAND1, IFI6, PRODH	507	815	13528	1.47326	1	0.241393	14.7688
GOTERM_BP_FAT	GO:0006917	induction of apoptosis	2.03797	0.00916276	FOXL2, VAV3, ABR, CADM1, ARHGEF6, APH1B, NR4A1, ARHGEF9, SFN, ARHGEF12, NLRP1, TNFSF10, CDKN1A, APOE, HIPK2, SORT1, PCSK9, CD24, NGFR, SCAND1, FGD3, PRODH	507	320	13528	1.83442	1	0.243625	15.0736
GOTERM_BP_FAT	GO:0042325	regulation of phosphorylation	2.0311	0.00930899	BMPR2, MAP4K1, SFN, CD74, IL31RA, DUSP19, APOE, MAP3K1, CD24, PDGFD, THBS1, EGF, INSR, MAP2K6, GHR, BMP4, VAV3, IGF2, PKIB, PKIA, ATP7A, ACVR2B, CDKN1A, DUSP2, LRP1, CCND2, JUN, BMP7, VLDLR	507	466	13528	1.6605	1	0.244572	15.2958
GOTERM_BP_FAT	GO:0012502	induction of programmed cell death	2.02722	0.00939237	FOXL2, VAV3, ABR, CADM1, ARHGEF6, APH1B, NR4A1, ARHGEF9, SFN, ARHGEF12, NLRP1, TNFSF10, CDKN1A, APOE, HIPK2, SORT1, PCSK9, CD24, NGFR, SCAND1, FGD3, PRODH	507	321	13528	1.8287	1	0.244077	15.4222
GOTERM_BP_FAT	GO:0050767	regulation of neurogenesis	2.02072	0.0095341	BMP4, LZTS1, PLXNB1, TTC3, HES1, NRCAM, SERPINF1, APOE, CCND2, PBX1, SEMA3A, CD24, NGFR, BMP7	507	166	13528	2.25033	1	0.244898	15.6367
GOTERM_BP_FAT	GO:0022604	regulation of cell morphogenesis	1.99698	0.0100697	NRCAM, LZTS1, PLXNB1, APOE, FYN, TGFBR3, SEMA3A, NGFR, RHOU, FGD3, TTC3, FN1	507	131	13528	2.44419	1	0.254353	16.4429
GOTERM_BP_FAT	GO:0007610	behavior	1.99587	0.0100955	GM2A, SOBP, FOS, NPAS1, SLC1A3, MYO15A, SEMA3A, SEPP1, PLCB1, APBA1, GNG7, CYR61, EGR1, EGR2, EFNB3, MAOA, PRKCG, FOSB, FOXP2, ATP7A, CXCL14, PTGDS, FYN, JUN, HIPK2, OTOG, C1QL1, RASD2, VLDLR	507	469	13528	1.64987	1	0.252528	16.4814
GOTERM_BP_FAT	GO:0007169	transmembrane receptor protein tyrosine kinase signaling pathway	1.99414	0.0101358	FGFR2, TXNIP, FGF18, RET, EFNB3, ARID5B, FLT4, BMPR2, IGF2, FOXO4, IL31RA, CTGF, SORT1, SH2B2, EGF, INSR, GHR	507	224	13528	2.02501	1	0.251052	16.5418
GOTERM_BP_FAT	GO:0008015	blood circulation	1.99212	0.010183	PPARA, ATP6AP2, TNNC1, PTGS1, ELN, EPHX2, BMPR2, SERPING1, MTHFR, ADRB1, APOE, CACNA1G, HCN4, SCN5A, MAP2K6	507	186	13528	2.15181	1	0.249749	16.6124
GOTERM_BP_FAT	GO:0003013	circulatory system process	1.99212	0.010183	PPARA, ATP6AP2, TNNC1, PTGS1, ELN, EPHX2, BMPR2, SERPING1, MTHFR, ADRB1, APOE, CACNA1G, HCN4, SCN5A, MAP2K6	507	186	13528	2.15181	1	0.249749	16.6124
GOTERM_BP_FAT	GO:0060284	regulation of cell development	1.99058	0.0102192	BMP4, LZTS1, PLXNB1, IGF2, TTC3, HES1, NRCAM, SERPINF1, CCND2, APOE, TGFBR3, PBX1, SEMA3A, CD24, NGFR, BMP7	507	205	13528	2.08253	1	0.248242	16.6666
GOTERM_BP_FAT	GO:0051240	positive regulation of multicellular organismal process	1.98485	0.0103549	BMP4, ATP6AP2, PTGS1, EPHX2, BMPR2, IGF2, GHRHR, ARNT, LAMA2, ACVR2B, ADRB1, SLC1A3, LIPG, ALOX5, THBS1, BMP7, GHR, BMP6	507	244	13528	1.96838	1	0.24884	16.8691
GOTERM_BP_FAT	GO:0031348	negative regulation of defense response	1.98373	0.0103816	ZFP36, TNFRSF1B, SERPINF1, APOE, SERPING1, IGF2	507	36	13528	4.44707	1	0.247174	16.9089
GOTERM_BP_FAT	GO:0006790	sulfur metabolic process	1.96006	0.0109633	MTHFR, CHST7, CHST6, CHST2, PHGDH, IDH1, GGT1, SEPP1, EXT2, GHR, CHST1	507	115	13528	2.55223	1	0.25685	17.7716
GOTERM_BP_FAT	GO:0042981	regulation of apoptosis	1.94575	0.0113306	ING4, CADM1, APH1B, CDH1, SFN, CD74, IL31RA, APOE, MAP3K1, PCSK9, CD24, PCSK6, THBS1, BMF, FGD3, MAP2K6, GHR, NMNAT3, TXNIP, FOXL2, VAV3, ABR, ARHGEF6, RXRA, NR4A1, IGF2, ARHGEF9, ARHGEF12, NLRP1, ATP7A, TNFSF10, CDKN1A, BTG2, CSRNP3, SFRP1, DUSP1, JUN, HIPK2, SORT1, NGFR, BMP7, SCAND1, IFI6, PRODH	507	804	13528	1.46023	1	0.261962	18.3119
GOTERM_BP_FAT	GO:0045778	positive regulation of ossification	1.94557	0.0113352	BMP4, ACVR2B, BMPR2, BMP7, BMP6	507	24	13528	5.55884	1	0.259807	18.3186
GOTERM_BP_FAT	GO:0033273	response to vitamin	1.94353	0.0113885	BMP4, DUSP1, RXRA, PTCH1, BMP7, IGFBP2, INSR, AQP3	507	66	13528	3.23424	1	0.258644	18.3967
GOTERM_BP_FAT	GO:0033559	unsaturated fatty acid metabolic process	1.93926	0.0115012	AKR1C3, PTGDS, PTGS1, EPHX2, FADS3, ALOX5, CD74	507	51	13528	3.6623	1	0.258654	18.5616
GOTERM_BP_FAT	GO:0009891	positive regulation of biosynthetic process	1.91979	0.0120284	PPARA, ABLIM2, ABCA1, PDX1, FOXO4, CALCOCO1, GHRHR, IL31RA, ARNT, FOS, MEIS2, APOE, MAP3K1, THBS1, NFATC2, INSR, SREBF1, EGR1, BMP4, FOXL2, EGR2, LMX1B, EGR4, RXRA, LEF1, NR4A1, IGF2, JUNB, ABCG1, SREBF2, HES1, CSRNP3, JUN, DYRK1B, HIPK2, PBX1, BMP7, NR5A2, BMP6	507	695	13528	1.49729	1	0.266592	19.3292
GOTERM_BP_FAT	GO:0001957	intramembranous ossification	1.88766	0.012952	FGF18, CTSK, AXIN2	507	5	13528	16.0095	1	0.281654	20.6574
GOTERM_BP_FAT	GO:0055091	phospholipid homeostasis	1.88766	0.012952	LIPG, ABCA1, ABCG1	507	5	13528	16.0095	1	0.281654	20.6574
GOTERM_BP_FAT	GO:0045669	positive regulation of osteoblast differentiation	1.8826	0.013104	BMP4, ACVR2B, BMPR2, BMP7, BMP6	507	25	13528	5.33649	1	0.282171	20.8739
GOTERM_BP_FAT	GO:0043067	regulation of programmed cell death	1.88083	0.0131575	ING4, CADM1, APH1B, CDH1, SFN, CD74, IL31RA, APOE, MAP3K1, PCSK9, CD24, PCSK6, THBS1, BMF, FGD3, MAP2K6, GHR, NMNAT3, TXNIP, FOXL2, VAV3, ABR, ARHGEF6, RXRA, NR4A1, IGF2, ARHGEF9, ARHGEF12, NLRP1, ATP7A, TNFSF10, CDKN1A, BTG2, CSRNP3, SFRP1, DUSP1, JUN, HIPK2, SORT1, NGFR, BMP7, SCAND1, IFI6, PRODH	507	812	13528	1.44585	1	0.280894	20.9501
GOTERM_BP_FAT	GO:0001932	regulation of protein amino acid phosphorylation	1.88039	0.0131709	BMP4, BMPR2, MAP4K1, IGF2, IL31RA, CCND2, MAP3K1, JUN, CD24, PDGFD, EGF, BMP7, INSR, GHR	507	173	13528	2.15927	1	0.278915	20.969
GOTERM_BP_FAT	GO:0051960	regulation of nervous system development	1.87953	0.0131969	BMP4, LZTS1, PLXNB1, TTC3, HES1, NRCAM, SERPINF1, CCND2, APOE, PBX1, SEMA3A, CD24, NGFR, EGF, BMP7	507	192	13528	2.08457	1	0.277194	21.006
GOTERM_BP_FAT	GO:0002009	morphogenesis of an epithelium	1.87689	0.0132774	BMP4, WNT4, RET, GPC3, FREM2, PBX1, PTCH1, JAG1, PDX1, FZD6	507	101	13528	2.64183	1	0.276469	21.1203
GOTERM_BP_FAT	GO:0006898	receptor-mediated endocytosis	1.86088	0.013776	DAB2, LRP1, APOE, FOLR1, SORL1, PIKFYVE, GHR	507	53	13528	3.5241	1	0.283084	21.8249
GOTERM_BP_FAT	GO:0000902	cell morphogenesis	1.83173	0.0147323	EGR2, SSH1, EFNB3, RXRA, MYO7A, KIF5C, NFASC, LEF1, CELSR2, SLIT3, NRCAM, HES1, ATP7A, DAB2, SEMA6C, SLC1A3, UNC5B, ANK3, TGFBR3, SEMA3A, NGFR, BMP7, FN1	507	356	13528	1.72387	1	0.297326	23.1594
GOTERM_BP_FAT	GO:0050954	sensory perception of mechanical stimulus	1.82524	0.0149542	DFNA5, SLC1A3, FYN, MYO15A, MAP1A, MYO7A, OTOG, SOBP, CRYM, GJB2	507	103	13528	2.59053	1	0.29884	23.466
GOTERM_BP_FAT	GO:0051174	regulation of phosphorus metabolic process	1.81611	0.0152719	BMPR2, MAP4K1, SFN, CD74, IL31RA, DUSP19, APOE, MAP3K1, CD24, PDGFD, THBS1, EGF, INSR, MAP2K6, GHR, BMP4, VAV3, IGF2, PKIB, PKIA, ATP7A, ACVR2B, CDKN1A, DUSP2, LRP1, CCND2, JUN, BMP7, VLDLR	507	485	13528	1.59545	1	0.301913	23.903
GOTERM_BP_FAT	GO:0019220	regulation of phosphate metabolic process	1.81611	0.0152719	BMPR2, MAP4K1, SFN, CD74, IL31RA, DUSP19, APOE, MAP3K1, CD24, PDGFD, THBS1, EGF, INSR, MAP2K6, GHR, BMP4, VAV3, IGF2, PKIB, PKIA, ATP7A, ACVR2B, CDKN1A, DUSP2, LRP1, CCND2, JUN, BMP7, VLDLR	507	485	13528	1.59545	1	0.301913	23.903
GOTERM_BP_FAT	GO:0031328	positive regulation of cellular biosynthetic process	1.79944	0.0158694	PPARA, ABLIM2, ABCA1, PDX1, FOXO4, CALCOCO1, GHRHR, IL31RA, ARNT, FOS, MEIS2, APOE, MAP3K1, THBS1, NFATC2, INSR, SREBF1, EGR1, BMP4, FOXL2, EGR2, LMX1B, EGR4, RXRA, LEF1, NR4A1, IGF2, JUNB, SREBF2, HES1, CSRNP3, JUN, DYRK1B, HIPK2, PBX1, BMP7, NR5A2, BMP6	507	685	13528	1.48019	1	0.309479	24.7184
GOTERM_BP_FAT	GO:0008037	cell recognition	1.78655	0.0163475	NRCAM, CADM1, EFNB3, ARSA, CNTNAP2, SEMA3A, ATP8B3	507	55	13528	3.39595	1	0.314933	25.3648
GOTERM_BP_FAT	GO:0043405	regulation of MAP kinase activity	1.77518	0.0167812	DUSP19, DUSP2, APOE, MAP3K1, MAP4K1, CD24, EGF, THBS1, INSR, CD74, MAP2K6, GHR	507	141	13528	2.27085	1	0.319558	25.9469
GOTERM_BP_FAT	GO:0051146	striated muscle cell differentiation	1.7686	0.0170372	TNNT2, KRT19, CDON, DYRK1B, RXRA, SORT1, MYOZ1, NEO1, FOXP1	507	88	13528	2.72889	1	0.321313	26.2883
GOTERM_BP_FAT	GO:0055008	cardiac muscle tissue morphogenesis	1.76585	0.0171455	TNNT2, LY6E, TNNC1, RXRA, TGFBR3	507	27	13528	4.94119	1	0.320756	26.4324
GOTERM_BP_FAT	GO:0060415	muscle tissue morphogenesis	1.76585	0.0171455	TNNT2, LY6E, TNNC1, RXRA, TGFBR3	507	27	13528	4.94119	1	0.320756	26.4324
GOTERM_BP_FAT	GO:0006915	apoptosis	1.74319	0.0180638	ING4, CADM1, APH1B, CGB7, SFN, DAPL1, TNFRSF1B, TSC22D3, UNC5B, TRIM69, MAP3K1, CD24, SEMA3A, THBS1, BMF, FGD3, RNF144B, FOXL2, ABR, VAV3, ARHGEF6, CECR2, ARHGEF9, ARHGEF12, NLRP1, DNASE2, TNFRSF10C, TNFSF10, CSRNP3, JUN, HIPK2, CYFIP2, NGFR, IFI6	507	602	13528	1.50698	1	0.332525	27.6428
GOTERM_BP_FAT	GO:0001934	positive regulation of protein amino acid phosphorylation	1.7416	0.01813	BMP4, CCND2, BMPR2, IGF2, CD24, BMP7, INSR, IL31RA, GHR	507	89	13528	2.69822	1	0.331265	27.7294
GOTERM_BP_FAT	GO:0060395	SMAD protein signal transduction	1.72239	0.01895	FOS, JUN, HIPK2	507	6	13528	13.3412	1	0.341152	28.7932
GOTERM_BP_FAT	GO:0010887	negative regulation of cholesterol storage	1.72239	0.01895	PPARA, ABCA1, ABCG1	507	6	13528	13.3412	1	0.341152	28.7932
GOTERM_BP_FAT	GO:0003007	heart morphogenesis	1.71912	0.0190933	TNNT2, LY6E, TNNC1, RXRA, TGFBR3, PTCH1, INSR, COL5A1	507	73	13528	2.9241	1	0.340982	28.9776
GOTERM_BP_FAT	GO:0033189	response to vitamin A	1.70938	0.0195263	BMP4, DUSP1, RXRA, PTCH1, IGFBP2, AQP3	507	42	13528	3.81178	1	0.344979	29.5321
GOTERM_BP_FAT	GO:0051591	response to cAMP	1.70938	0.0195263	CYP7B1, FOS, DUSP1, CCND2, JUN, JUNB	507	42	13528	3.81178	1	0.344979	29.5321
GOTERM_BP_FAT	GO:0014902	myotube differentiation	1.69341	0.0202575	CDON, DYRK1B, SORT1, NEO1	507	16	13528	6.67061	1	0.353093	30.4591
GOTERM_BP_FAT	GO:0043462	regulation of ATPase activity	1.69341	0.0202575	TNNT2, TNNT3, TNNC1, PXK	507	16	13528	6.67061	1	0.353093	30.4591
GOTERM_BP_FAT	GO:0033280	response to vitamin D	1.69341	0.0202575	RXRA, BMP7, INSR, AQP3	507	16	13528	6.67061	1	0.353093	30.4591
GOTERM_BP_FAT	GO:0051412	response to corticosterone stimulus	1.69341	0.0202575	FOS, CDKN1A, PTGS1, JUNB	507	16	13528	6.67061	1	0.353093	30.4591
GOTERM_BP_FAT	GO:0043691	reverse cholesterol transport	1.69341	0.0202575	APOE, LIPG, ABCA1, ABCG1	507	16	13528	6.67061	1	0.353093	30.4591
GOTERM_BP_FAT	GO:0051216	cartilage development	1.68966	0.0204333	WNT5A, ATP7A, BMP4, FGF18, CTGF, BMP7, GHR, BMP6	507	74	13528	2.88459	1	0.35329	30.6802
GOTERM_BP_FAT	GO:0035239	tube morphogenesis	1.68248	0.0207741	BMP4, WNT4, RET, GPC3, PBX1, PTCH1, MMP14, EGF, BMP7, FZD6, CYR61	507	127	13528	2.31108	1	0.355761	31.107
GOTERM_BP_FAT	GO:0045941	positive regulation of transcription	1.67784	0.020997	PPARA, ABLIM2, PDX1, FOXO4, CALCOCO1, IL31RA, ARNT, FOS, MEIS2, MAP3K1, NFATC2, SREBF1, EGR1, BMP4, FOXL2, EGR2, LMX1B, EGR4, RXRA, LEF1, NR4A1, JUNB, SREBF2, HES1, CSRNP3, JUN, DYRK1B, HIPK2, PBX1, NR5A2, BMP7, BMP6	507	564	13528	1.5139	1	0.356577	31.3848
GOTERM_BP_FAT	GO:0045667	regulation of osteoblast differentiation	1.66882	0.0214377	BMP4, ACVR2B, BMPR2, AXIN2, BMP7, BMP6	507	43	13528	3.72313	1	0.360323	31.931
GOTERM_BP_FAT	GO:0048511	rhythmic process	1.66131	0.0218118	BMP4, CYP7B1, FOXL2, EGR2, PTGDS, CCND2, JUN, TEF, PER3, MMP14, LFNG	507	128	13528	2.29302	1	0.363105	32.3914
GOTERM_BP_FAT	GO:0030199	collagen fibril organization	1.65981	0.0218873	ATP7A, LMX1B, ADAMTS14, COL5A2, COL5A1	507	29	13528	4.60042	1	0.361892	32.484
GOTERM_BP_FAT	GO:0012501	programmed cell death	1.65723	0.0220178	ING4, CADM1, APH1B, CGB7, SFN, DAPL1, TNFRSF1B, TSC22D3, UNC5B, TRIM69, MAP3K1, CD24, SEMA3A, THBS1, BMF, FGD3, RNF144B, FOXL2, ABR, VAV3, ARHGEF6, CECR2, ARHGEF9, ARHGEF12, NLRP1, DNASE2, TNFRSF10C, TNFSF10, CSRNP3, JUN, HIPK2, CYFIP2, NGFR, IFI6	507	611	13528	1.48478	1	0.361418	32.6437
GOTERM_BP_FAT	GO:0001655	urogenital system development	1.65641	0.0220593	BMP4, ACVR2B, RET, GPC3, SFRP1, ARID5B, PCSK9, LEF1, PBX1, BMP7	507	110	13528	2.42568	1	0.359788	32.6944
GOTERM_BP_FAT	GO:0006357	regulation of transcription from RNA polymerase II promoter	1.63853	0.0229862	PPARA, ABLIM2, PDX1, CALCOCO1, ARNT, FOS, NPAS1, MEIS2, MAP3K1, TRAK1, TEF, NFATC2, SREBF1, EGR1, BMP4, SATB1, FOXL2, WDTC1, EGR2, LMX1B, RXRA, LEF1, NR4A1, FOSB, PKIA, JUNB, FOXP1, SREBF2, FOXP2, MXD4, HES1, CSRNP3, JUN, HIPK2, PBX1, BMP7, NR5A2, CRYM, BMP6	507	727	13528	1.43138	1	0.36961	33.8177
GOTERM_BP_FAT	GO:0007389	pattern specification process	1.63849	0.0229887	BMP4, ARC, EGR2, LMX1B, BMPR2, LEF1, CELSR2, HES1, ACVR2B, BTG2, SFRP1, HIPK2, PTCH1, PBX1, AXIN2, BMP7, LFNG, CYR61	507	267	13528	1.79882	1	0.367468	33.8207
GOTERM_BP_FAT	GO:0051338	regulation of transferase activity	1.63746	0.0230432	VAV3, MAP4K1, IGF2, PKIB, SFN, PKIA, CD74, ACVR2B, DUSP19, SERINC5, CDKN1A, DUSP2, LRP1, CCND2, APOE, MAP3K1, CD24, THBS1, EGF, INSR, MAP2K6, VLDLR, GHR	507	372	13528	1.64972	1	0.36601	33.8862
GOTERM_BP_FAT	GO:0007611	learning or memory	1.63371	0.023243	EGR1, FOS, EGR2, GM2A, FYN, JUN, PRKCG, PLCB1, VLDLR, FOXP2	507	111	13528	2.40382	1	0.366403	34.1259
GOTERM_BP_FAT	GO:0030509	BMP signaling pathway	1.62954	0.0234669	BMP4, ACVR2B, BMPR2, TGFBR3, BMP7, BMP6	507	44	13528	3.63852	1	0.367089	34.3933
GOTERM_BP_FAT	GO:0043009	chordate embryonic development	1.61839	0.0240774	BMP4, WDTC1, FUT8, LMX1B, LEF1, CDH1, JUNB, ARNT, FZD6, HES1, DAB2, LY6E, SFRP1, GRN, PHGDH, TGFBR3, PBX1, PTCH1, AXIN2, HCN4, APBA1	507	331	13528	1.69284	1	0.372537	35.1175
GOTERM_BP_FAT	GO:0008624	induction of apoptosis by extracellular signals	1.61134	0.0244714	ABR, VAV3, ARHGEF6, APH1B, SORT1, ARHGEF9, NGFR, CD24, ARHGEF12, FGD3	507	112	13528	2.38236	1	0.375238	35.5809
GOTERM_BP_FAT	GO:0030510	regulation of BMP signaling pathway	1.61031	0.0245294	GPC3, SOST, HTRA1, HIPK2, PCSK6	507	30	13528	4.44707	1	0.373838	35.6489
GOTERM_BP_FAT	GO:0030500	regulation of bone mineralization	1.61031	0.0245294	BMP4, ACVR2B, BMPR2, BMP7, BMP6	507	30	13528	4.44707	1	0.373838	35.6489
GOTERM_BP_FAT	GO:0010769	regulation of cell morphogenesis involved in differentiation	1.60479	0.0248436	NRCAM, LZTS1, PLXNB1, APOE, TGFBR3, SEMA3A, NGFR, TTC3	507	77	13528	2.7722	1	0.375531	36.0158
GOTERM_BP_FAT	GO:0007423	sensory organ development	1.60306	0.0249426	BMP4, DFNA5, FOXL2, LMX1B, MYO7A, SOBP, JAG1, COL5A2, COL5A1, FZD6, FOXP2, HES1, MEIS2, MYO15A, MAP3K1, BMP7	507	229	13528	1.86428	1	0.374639	36.131
GOTERM_BP_FAT	GO:0009611	response to wounding	1.5929	0.0255327	PPARA, C1R, PXK, TLR5, FOS, TNFRSF1B, HMCN1, SLC1A3, CTGF, MAP3K1, CD24, THBS1, FN1, C4A, C4B, CFB, SCUBE1, RXRA, CHST2, EPHX2, IGF2, SERPING1, COL5A1, CHST1, PLSCR4, TFPI, ALOX5, NGFR, PROS1, BMP6	507	530	13528	1.51033	1	0.379553	36.8136
GOTERM_BP_FAT	GO:0032365	intracellular lipid transport	1.58705	0.0258792	SLC25A20, ABCA1, ABCG1	507	7	13528	11.4353	1	0.381537	37.2112
GOTERM_BP_FAT	GO:0040036	regulation of fibroblast growth factor receptor signaling pathway	1.58705	0.0258792	WNT4, NGFR, THBS1	507	7	13528	11.4353	1	0.381537	37.2112
GOTERM_BP_FAT	GO:0045821	positive regulation of glycolysis	1.58705	0.0258792	IGF2, INSR, ARNT	507	7	13528	11.4353	1	0.381537	37.2112
GOTERM_BP_FAT	GO:0060263	regulation of respiratory burst	1.58705	0.0258792	NOXA1, IGF2, INSR	507	7	13528	11.4353	1	0.381537	37.2112
GOTERM_BP_FAT	GO:0010817	regulation of hormone levels	1.57871	0.0263809	SCPEP1, ACVR2B, WNT4, LY6E, CPE, RBP1, ATP6AP2, TRPV4, PDX1, PCSK6, GHRHR, CRYM	507	151	13528	2.12046	1	0.385274	37.7827
GOTERM_BP_FAT	GO:0009792	embryonic development ending in birth or egg hatching	1.57854	0.0263911	BMP4, WDTC1, FUT8, LMX1B, LEF1, CDH1, JUNB, ARNT, FZD6, HES1, DAB2, LY6E, SFRP1, GRN, PHGDH, TGFBR3, PBX1, PTCH1, AXIN2, HCN4, APBA1	507	334	13528	1.67764	1	0.383339	37.7943
GOTERM_BP_FAT	GO:0001822	kidney development	1.56511	0.0272202	BMP4, ACVR2B, RET, GPC3, ARID5B, PCSK9, LEF1, PBX1, BMP7	507	96	13528	2.50148	1	0.390698	38.7279
GOTERM_BP_FAT	GO:0050728	negative regulation of inflammatory response	1.56295	0.0273559	ZFP36, TNFRSF1B, SERPINF1, APOE, IGF2	507	31	13528	4.30362	1	0.390174	38.8794
GOTERM_BP_FAT	GO:0008637	apoptotic mitochondrial changes	1.56295	0.0273559	MAP3K1, JUN, SFN, CD24, IFI6	507	31	13528	4.30362	1	0.390174	38.8794
GOTERM_BP_FAT	GO:0043549	regulation of kinase activity	1.56026	0.0275257	VAV3, MAP4K1, IGF2, PKIB, SFN, PKIA, CD74, ACVR2B, DUSP19, CDKN1A, DUSP2, LRP1, CCND2, APOE, MAP3K1, CD24, THBS1, EGF, INSR, MAP2K6, VLDLR, GHR	507	357	13528	1.6443	1	0.390036	39.0685
GOTERM_BP_FAT	GO:0045664	regulation of neuron differentiation	1.55955	0.0275711	NRCAM, HES1, LZTS1, PLXNB1, CCND2, APOE, PBX1, SEMA3A, NGFR, CD24, TTC3	507	133	13528	2.20682	1	0.388525	39.119
GOTERM_BP_FAT	GO:0045834	positive regulation of lipid metabolic process	1.5546	0.0278871	PPARA, VAV3, APOE, IGF2, ABCG1, BMP6	507	46	13528	3.48032	1	0.390004	39.4692
GOTERM_BP_FAT	GO:0007242	intracellular signaling cascade	1.54843	0.0282862	PDX1, TLR5, FOXO4, RHOU, GHRHR, RGL1, IL31RA, CTGF, APOE, PLCB1, INSR, MAP2K6, GNG7, GHR, ZFP36, RET, PLXNB1, RXRA, ARHGEF6, PRKCG, ARHGEF12, RASL12, FOXN3, PRKD1, RND2, TNS3, ADRB1, HIPK2, PPM1L, RASD1, RASD2, WNT5A, ING4, RAB3B, RALGPS1, MAP4K1, ABCA1, SFN, CD74, CALCOCO1, DUSP19, ROPN1B, P2RY2, MAP3K1, PIKFYVE, PLCD4, SH2B2, EGF, THBS1, KNDC1, ABR, VAV3, OPRL1, IGF2, MAPK10, RCAN2, DUSP2, DUSP…	507	1256	13528	1.29588	1	0.392365	39.9088
GOTERM_BP_FAT	GO:0048878	chemical homeostasis	1.54164	0.0287317	FXYD1, SLC9A9, NR3C2, ABCA1, PDX1, GHRHR, SERINC5, APOE, P2RY2, PCSK9, TRPV4, SV2A, CD24, INSR, WDTC1, EGR2, OPRL1, EPHX2, IGF2, TMPRSS3, ABCG1, ATP7A, JUN, LIPG, CACNA1G, PTCH1, NR5A2, SLC40A1, IFI6	507	512	13528	1.51131	1	0.395186	40.3959
GOTERM_BP_FAT	GO:0007605	sensory perception of sound	1.54156	0.0287369	DFNA5, SLC1A3, MYO15A, MAP1A, MYO7A, OTOG, SOBP, CRYM, GJB2	507	97	13528	2.47569	1	0.393263	40.4015
GOTERM_BP_FAT	GO:0048812	neuron projection morphogenesis	1.53312	0.0293008	EGR2, EFNB3, RXRA, KIF5C, NFASC, CELSR2, SLIT3, ATP7A, NRCAM, SEMA6C, UNC5B, ANK3, SEMA3A, NGFR, BMP7	507	213	13528	1.87905	1	0.397293	41.0127
GOTERM_BP_FAT	GO:0010628	positive regulation of gene expression	1.52702	0.0297152	PPARA, ABLIM2, PDX1, FOXO4, CALCOCO1, IL31RA, ARNT, FOS, MEIS2, MAP3K1, NFATC2, SREBF1, EGR1, BMP4, FOXL2, EGR2, LMX1B, EGR4, RXRA, LEF1, NR4A1, JUNB, SREBF2, HES1, CSRNP3, JUN, DYRK1B, HIPK2, PBX1, NR5A2, BMP7, BMP6	507	581	13528	1.4696	1	0.399686	41.4581
GOTERM_BP_FAT	GO:0042157	lipoprotein metabolic process	1.52483	0.0298658	PPARA, PIGZ, LRP1, SEMA6D, APOE, PCSK9, ABCA1, PIGN	507	80	13528	2.66824	1	0.399301	41.6192
GOTERM_BP_FAT	GO:0048732	gland development	1.52066	0.0301534	HES1, BMP4, LY6E, SFRP1, LEF1, CDH1, PBX1, PTCH1, EDA, BMP7, GHRHR	507	135	13528	2.17413	1	0.400337	41.9256
GOTERM_BP_FAT	GO:0070167	regulation of biomineral formation	1.51757	0.0303689	BMP4, ACVR2B, BMPR2, BMP7, BMP6	507	32	13528	4.16913	1	0.40062	42.1542
GOTERM_BP_FAT	GO:0009267	cellular response to starvation	1.51757	0.0303689	SREBF1, JUN, BMPR2, PCSK9, CTSD	507	32	13528	4.16913	1	0.40062	42.1542
GOTERM_BP_FAT	GO:0016477	cell migration	1.51578	0.0304943	RET, VAV3, FUT8, LMX1B, PLXNB1, ARID5B, PODXL, MMP14, COL5A1, NRCAM, TNS3, TNS1, CTGF, FYN, TGFBR3, CD24, THBS1, FN1	507	276	13528	1.74016	1	0.399981	42.2868
GOTERM_BP_FAT	GO:0016053	organic acid biosynthetic process	1.50642	0.0311589	CYP7B1, SLC1A3, PTGDS, ASS1, SCD, PTGS1, UROS, FADS3, PHGDH, ALOX5, CD74, PRODH	507	155	13528	2.06574	1	0.404803	42.9851
GOTERM_BP_FAT	GO:0046394	carboxylic acid biosynthetic process	1.50642	0.0311589	CYP7B1, SLC1A3, PTGDS, ASS1, SCD, PTGS1, UROS, FADS3, PHGDH, ALOX5, CD74, PRODH	507	155	13528	2.06574	1	0.404803	42.9851
GOTERM_BP_FAT	GO:0031668	cellular response to extracellular stimulus	1.49474	0.0320083	SREBF1, FOS, CDKN1A, JUN, BMPR2, PCSK9, CTSD	507	64	13528	2.91839	1	0.411363	43.8658
GOTERM_BP_FAT	GO:0008585	female gonad development	1.49474	0.0320083	BMP4, WNT4, FOXL2, CCND2, IDH1, MMP14, LFNG	507	64	13528	2.91839	1	0.411363	43.8658
GOTERM_BP_FAT	GO:0006692	prostanoid metabolic process	1.49112	0.0322759	AKR1C3, PTGDS, PTGS1, CD74	507	19	13528	5.61736	1	0.412084	44.1406
GOTERM_BP_FAT	GO:0006693	prostaglandin metabolic process	1.49112	0.0322759	AKR1C3, PTGDS, PTGS1, CD74	507	19	13528	5.61736	1	0.412084	44.1406
GOTERM_BP_FAT	GO:0050881	musculoskeletal movement	1.49112	0.0322759	TNNT3, TNNT1, TNNC1, HIPK2	507	19	13528	5.61736	1	0.412084	44.1406
GOTERM_BP_FAT	GO:0050879	multicellular organismal movement	1.49112	0.0322759	TNNT3, TNNT1, TNNC1, HIPK2	507	19	13528	5.61736	1	0.412084	44.1406
GOTERM_BP_FAT	GO:0051094	positive regulation of developmental process	1.48604	0.0326554	BMP4, PLXNB1, BMPR2, IGF2, JAG1, VASH2, CD74, JUNB, ARNT, NRCAM, ACVR2B, SERPINF1, JUN, NGFR, THBS1, BMP7, INSR, BMP6	507	278	13528	1.72764	1	0.413888	44.5282
GOTERM_BP_FAT	GO:0051346	negative regulation of hydrolase activity	1.48409	0.0328026	TNNT2, NR4A1, SORT1, PXK, SFN, IFI6	507	48	13528	3.33531	1	0.413417	44.6778
GOTERM_BP_FAT	GO:0001701	in utero embryonic development	1.48355	0.0328436	HES1, DAB2, WDTC1, LY6E, LMX1B, FUT8, GRN, TGFBR3, CDH1, HCN4, JUNB, APBA1, ARNT	507	176	13528	1.97086	1	0.411925	44.7194
GOTERM_BP_FAT	GO:0010557	positive regulation of macromolecule biosynthetic process	1.48251	0.0329221	PPARA, ABLIM2, PDX1, FOXO4, CALCOCO1, IL31RA, ARNT, FOS, MEIS2, MAP3K1, THBS1, NFATC2, INSR, SREBF1, EGR1, BMP4, FOXL2, EGR2, LMX1B, EGR4, RXRA, LEF1, NR4A1, IGF2, JUNB, SREBF2, HES1, CSRNP3, JUN, DYRK1B, HIPK2, PBX1, BMP7, NR5A2, BMP6	507	654	13528	1.42796	1	0.410809	44.799
GOTERM_BP_FAT	GO:0048754	branching morphogenesis of a tube	1.46604	0.0341947	BMP4, GPC3, PBX1, MMP14, EGF, BMP7, CYR61	507	65	13528	2.87349	1	0.42105	46.0742
GOTERM_BP_FAT	GO:0045859	regulation of protein kinase activity	1.45102	0.0353981	MAP4K1, IGF2, PKIB, SFN, PKIA, CD74, ACVR2B, DUSP19, CDKN1A, DUSP2, LRP1, CCND2, APOE, MAP3K1, CD24, EGF, THBS1, INSR, MAP2K6, VLDLR, GHR	507	345	13528	1.62415	1	0.430374	47.2545
GOTERM_BP_FAT	GO:0009914	hormone transport	1.45038	0.0354501	ACVR2B, LY6E, TRPV4, PDX1, GHRHR, CRYM	507	49	13528	3.26724	1	0.428963	47.3049
GOTERM_BP_FAT	GO:0030030	cell projection organization	1.44013	0.0362966	EGR2, VAV3, EFNB3, RXRA, MYO7A, KIF5C, NFASC, CDH1, CELSR2, SLIT3, NRCAM, ATP7A, SEMA6C, UNC5B, ANK3, MAP2, PHGDH, SEMA3A, CD24, NGFR, BMP7, FGD3	507	368	13528	1.59515	1	0.4348	48.1198
GOTERM_BP_FAT	GO:0009628	response to abiotic stimulus	1.44013	0.0362966	BMP4, TXNIP, FECH, MMP14, JUNB, FOXP2, PDE6B, FOS, CDKN1A, ADRB1, SLC1A3, DUSP1, BTG2, FYN, JUN, MAP3K1, ARSA, TRPV4, PTCH1, NGFR, IGFBP2, THBS1	507	368	13528	1.59515	1	0.4348	48.1198
GOTERM_BP_FAT	GO:0051347	positive regulation of transferase activity	1.4399	0.0363158	VAV3, MAP4K1, IGF2, CD74, ACVR2B, SERINC5, LRP1, CCND2, MAP3K1, CD24, EGF, THBS1, INSR, MAP2K6, VLDLR, GHR	507	240	13528	1.77883	1	0.433095	48.1381
GOTERM_BP_FAT	GO:0006954	inflammatory response	1.43579	0.0366612	C4A, CFB, C4B, SCUBE1, RXRA, EPHX2, CHST2, IGF2, SERPING1, C1R, TLR5, PXK, CHST1, FOS, TNFRSF1B, CD24, ALOX5, THBS1, BMP6, FN1	507	325	13528	1.642	1	0.434334	48.4671
GOTERM_BP_FAT	GO:0032570	response to progesterone stimulus	1.43244	0.0369455	TXNIP, FOS, THBS1, JUNB	507	20	13528	5.33649	1	0.435013	48.7363
GOTERM_BP_FAT	GO:0006636	unsaturated fatty acid biosynthetic process	1.43227	0.0369599	PTGDS, PTGS1, FADS3, ALOX5, CD74	507	34	13528	3.92389	1	0.433295	48.75
GOTERM_BP_FAT	GO:0043406	positive regulation of MAP kinase activity	1.42949	0.0371973	MAP3K1, MAP4K1, CD24, EGF, THBS1, INSR, CD74, MAP2K6, GHR	507	102	13528	2.35433	1	0.433561	48.9737
GOTERM_BP_FAT	GO:0009952	anterior/posterior pattern formation	1.42774	0.0373477	HES1, ACVR2B, ARC, BTG2, SFRP1, HIPK2, BMPR2, LEF1, PBX1, AXIN2, LFNG	507	140	13528	2.09648	1	0.433061	49.115
GOTERM_BP_FAT	GO:0032102	negative regulation of response to external stimulus	1.41764	0.0382257	ZFP36, PPARA, TNFRSF1B, SERPINF1, APOE, IGF2	507	50	13528	3.20189	1	0.438894	49.9325
GOTERM_BP_FAT	GO:0060562	epithelial tube morphogenesis	1.4106	0.0388512	BMP4, WNT4, RET, GPC3, PBX1, PTCH1, FZD6	507	67	13528	2.78772	1	0.442452	50.5073
GOTERM_BP_FAT	GO:0005996	monosaccharide metabolic process	1.40255	0.0395779	WDTC1, FUT8, OGDHL, CHST2, IGF2, PDX1, CHST1, GALM, MAN2B2, CHST7, H6PD, CHST6, PPP1R1A, OTOG, FUT2	507	222	13528	1.80287	1	0.446808	51.1673
GOTERM_BP_FAT	GO:0051674	localization of cell	1.39446	0.040322	RET, VAV3, FUT8, LMX1B, PLXNB1, PODXL, ARID5B, MMP14, COL5A1, NRCAM, TNS3, TNS1, CTGF, ROPN1B, FYN, TGFBR3, CD24, THBS1, FN1	507	307	13528	1.65136	1	0.451232	51.8345
GOTERM_BP_FAT	GO:0048598	embryonic morphogenesis	1.39446	0.040322	BMP4, WNT5A, RET, FOXL2, MYO7A, BMPR2, LEF1, SOBP, PDX1, FZD6, HES1, ACVR2B, WNT4, MYO15A, CDON, PBX1, PTCH1, BMP7, EXT2	507	307	13528	1.65136	1	0.451232	51.8345
GOTERM_BP_FAT	GO:0048870	cell motility	1.39446	0.040322	RET, VAV3, FUT8, LMX1B, PLXNB1, PODXL, ARID5B, MMP14, COL5A1, NRCAM, TNS3, TNS1, CTGF, ROPN1B, FYN, TGFBR3, CD24, THBS1, FN1	507	307	13528	1.65136	1	0.451232	51.8345
GOTERM_BP_FAT	GO:0051129	negative regulation of cellular component organization	1.3922	0.0405325	PACSIN1, TMSB15A, MAP3K1, MAP1A, MAP2, TGFBR3, SEMA3A, NGFR, MMP14, THBS1, TTC3	507	142	13528	2.06695	1	0.451169	52.0217
GOTERM_BP_FAT	GO:0030198	extracellular matrix organization	1.38716	0.0410055	ATP7A, LMX1B, ADAMTS14, ELN, COL6A2, COL5A2, COL5A1, COL4A6, CYR61	507	104	13528	2.30906	1	0.453268	52.4398
GOTERM_BP_FAT	GO:0008038	neuron recognition	1.37736	0.0419408	NRCAM, EFNB3, CNTNAP2, SEMA3A	507	21	13528	5.08237	1	0.459094	53.2564
GOTERM_BP_FAT	GO:0006024	glycosaminoglycan biosynthetic process	1.37736	0.0419408	CHST7, CHST6, GALNT5, EXT2	507	21	13528	5.08237	1	0.459094	53.2564
GOTERM_BP_FAT	GO:0000122	negative regulation of transcription from RNA polymerase II promoter	1.37527	0.0421436	EGR1, PPARA, SATB1, WDTC1, RXRA, LEF1, FOSB, PDX1, PKIA, FOXP1, MXD4, FOXP2, HES1, NPAS1, MEIS2, HIPK2, CRYM	507	266	13528	1.70527	1	0.458931	53.4317
GOTERM_BP_FAT	GO:0048635	negative regulation of muscle development	1.37443	0.0422251	BMP4, LEF1, NGFR	507	9	13528	8.89415	1	0.457796	53.502
GOTERM_BP_FAT	GO:0033574	response to testosterone stimulus	1.37443	0.0422251	DUSP1, CCND2, INSR	507	9	13528	8.89415	1	0.457796	53.502
GOTERM_BP_FAT	GO:0046034	ATP metabolic process	1.3665	0.0430033	ATP7A, ATP2A3, ATP1B2, ATP9A, ATP8A2, ATP8B2, AK5, ATP8B3, ATP8A1	507	105	13528	2.28707	1	0.462223	54.1681
GOTERM_BP_FAT	GO:0008544	epidermis development	1.35865	0.0437877	ATP7A, TXNIP, PPARA, CTGF, KRT15, LEF1, PTCH1, SFN, NGFR, JAG1, EDA, COL5A2, COL5A1	507	184	13528	1.88517	1	0.46662	54.8303
GOTERM_BP_FAT	GO:0035270	endocrine system development	1.35761	0.0438925	HES1, BMP4, LY6E, CDH1, PBX1, PDX1, GHRHR	507	69	13528	2.70691	1	0.465662	54.9181
GOTERM_BP_FAT	GO:0046660	female sex differentiation	1.35761	0.0438925	BMP4, WNT4, FOXL2, CCND2, IDH1, MMP14, LFNG	507	69	13528	2.70691	1	0.465662	54.9181
GOTERM_BP_FAT	GO:0046545	development of primary female sexual characteristics	1.35761	0.0438925	BMP4, WNT4, FOXL2, CCND2, IDH1, MMP14, LFNG	507	69	13528	2.70691	1	0.465662	54.9181
GOTERM_BP_FAT	GO:0006979	response to oxidative stress	1.35555	0.0441014	TXNIP, ATP7A, FOS, NPTXR, DUSP1, APOE, JUN, PTGS1, IDH1, SEPP1, MMP14, ARNT	507	164	13528	1.95237	1	0.465521	55.0926
GOTERM_BP_FAT	GO:0006469	negative regulation of protein kinase activity	1.35528	0.0441284	CDKN1A, DUSP19, DUSP2, APOE, IGF2, PKIB, SFN, PKIA	507	87	13528	2.45356	1	0.463975	55.1151
GOTERM_BP_FAT	GO:0001707	mesoderm formation	1.3535	0.0443095	BMP4, BMPR2, LEF1, BMP7, EXT2	507	36	13528	3.7059	1	0.463629	55.2658
GOTERM_BP_FAT	GO:0031331	positive regulation of cellular catabolic process	1.3535	0.0443095	PPARA, APOE, IGF2, INSR, ARNT	507	36	13528	3.7059	1	0.463629	55.2658
GOTERM_BP_FAT	GO:0060429	epithelium development	1.33874	0.0458416	BMP4, TXNIP, RET, SCUBE1, JAG1, PDX1, SFN, FZD6, WNT4, GPC3, FREM2, JUN, PTCH1, PBX1, BMP7	507	227	13528	1.76316	1	0.473572	56.5218
GOTERM_BP_FAT	GO:0045892	negative regulation of transcription, DNA-dependent	1.33638	0.0460918	EGR1, PPARA, SATB1, ING4, WDTC1, ARID5B, RXRA, LEF1, FOSB, PDX1, PKIA, FOXN3, FOXP1, MXD4, FOXP2, HES1, NPAS1, MEIS2, HIPK2, RASD1, CRYM	507	356	13528	1.57396	1	0.473709	56.7237
GOTERM_BP_FAT	GO:0045861	negative regulation of proteolysis	1.32554	0.0472563	SERPINA5, SERPING1, IGF2, THBS1	507	22	13528	4.85135	1	0.48063	57.6518
GOTERM_BP_FAT	GO:0001889	liver development	1.32485	0.047331	HES1, CADM1, CCND2, RXRA, PCSK9, TGFBR3	507	53	13528	3.02065	1	0.479442	57.7108
GOTERM_BP_FAT	GO:0045597	positive regulation of cell differentiation	1.31717	0.048176	BMP4, PLXNB1, BMPR2, IGF2, JAG1, CD74, JUNB, ARNT, NRCAM, ACVR2B, SERPINF1, JUN, NGFR, BMP7, BMP6	507	229	13528	1.74776	1	0.483885	58.3716
GOTERM_BP_FAT	GO:0015918	sterol transport	1.31633	0.048269	OSBPL5, APOE, LIPG, ABCA1, ABCG1	507	37	13528	3.60574	1	0.482832	58.4437
GOTERM_BP_FAT	GO:0030301	cholesterol transport	1.31633	0.048269	OSBPL5, APOE, LIPG, ABCA1, ABCG1	507	37	13528	3.60574	1	0.482832	58.4437
GOTERM_BP_FAT	GO:0006754	ATP biosynthetic process	1.31079	0.0488889	ATP7A, ATP2A3, ATP1B2, ATP9A, ATP8A2, ATP8B2, ATP8B3, ATP8A1	507	89	13528	2.39842	1	0.48558	58.9216

## Sheet: Early stage
Table SIII-B. DAVID_GO_BP for DEGs in early stage of irradiation (P<0.05).
Category	Term		-log(pvalue)	PValue	Genes	List Total	Pop Hits	Pop Total	Fold Enrichment	Bonferroni	Benjamini	FDR
GOTERM_BP_FAT	GO:0034660	ncRNA metabolic process	9.85076	1.41006e-10	RPL14, GAR1, VARS, PUS7L, SBDS, WDR36, DKC1, CTU1, TRMT6, QTRTD1, SBDSP1, NPM3, MARS2, TARSL2, IMP4, NSUN2, EPRS, RRP9, LARS2, TRMT61A, NOP14, PA2G4, DDX56, NOP2, NOLC1, POP1, FARSB, WDR4, NOP58, FARSA, NOP56, PES1, RPP40	480	230	13528	3.92116	3.28121e-07	3.28121e-07	2.4672e-07
GOTERM_BP_FAT	GO:0022613	ribonucleoprotein complex biogenesis	9.00525	9.87994e-10	RPL14, GAR1, DICER1, EBNA1BP2, SBDS, WDR36, DKC1, PRMT5, SBDSP1, NPM3, IMP4, GEMIN5, TSR1, BYSL, MBNL1, RRP9, NOP14, PA2G4, DDX56, NOP2, NOLC1, RRS1, NOP58, NOP56, SNRPC, SNRPF, PES1, SNRPE	480	180	13528	4.2275	2.29906e-06	1.14953e-06	1.72871e-06
GOTERM_BP_FAT	GO:0034470	ncRNA processing	7.97826	1.05133e-08	RPL14, GAR1, DICER1, PUS7L, SBDS, WDR36, DKC1, CTU1, TRMT6, QTRTD1, SBDSP1, NPM3, IMP4, NSUN2, RRP9, TRMT61A, NOP14, PA2G4, DDX56, NOP2, NOLC1, WDR4, POP1, NOP58, NOP56, PES1, RPP40	480	187	13528	3.91854	2.44642e-05	8.15479e-06	1.83953e-05
GOTERM_BP_FAT	GO:0042254	ribosome biogenesis	7.27414	5.31936e-08	TSR1, RPL14, GAR1, BYSL, RRP9, NOP14, EBNA1BP2, SBDS, PA2G4, DDX56, WDR36, NOP2, DKC1, NOLC1, SBDSP1, NPM3, RRS1, NOP58, NOP56, PES1, IMP4	480	122	13528	4.62022	0.000123774	3.09449e-05	9.30735e-05
GOTERM_BP_FAT	GO:0006364	rRNA processing	6.13098	7.39632e-07	RPL14, GAR1, RRP9, NOP14, PA2G4, DDX56, SBDS, WDR36, NOP2, DKC1, NOLC1, SBDSP1, NOP58, NPM3, NOP56, PES1, IMP4	480	92	13528	4.90145	0.00171964	0.000344166	0.00129414
GOTERM_BP_FAT	GO:0006412	translation	6.10256	7.89659e-07	MRPS15, MRPL41, RPL14, RPL13, RBM3, HBS1L, EIF5, RPL35, EIF5A, RPL22L1, VARS, EIF3C, RPS26, MRPL12, EIF4EBP2, MRPL15, TRMT6, MARS2, EIF3I, TARSL2, MRPL1, MRPL3, EIF2S3, EPRS, LARS2, MRPL24, MRPL21, MRPS9, RPL7L1, EIF4A1, FARSB, FARSA	480	331	13528	2.72467	0.00183585	0.000306209	0.00138167
GOTERM_BP_FAT	GO:0016072	rRNA metabolic process	5.88714	1.29675e-06	RPL14, GAR1, RRP9, NOP14, PA2G4, DDX56, SBDS, WDR36, NOP2, DKC1, NOLC1, SBDSP1, NOP58, NPM3, NOP56, PES1, IMP4	480	96	13528	4.69722	0.003013	0.000430985	0.00226892
GOTERM_BP_FAT	GO:0006399	tRNA metabolic process	4.7555	1.75591e-05	EPRS, LARS2, VARS, TRMT61A, PUS7L, CTU1, TRMT6, QTRTD1, WDR4, FARSB, POP1, MARS2, FARSA, NSUN2, TARSL2, RPP40	480	118	13528	3.82147	0.0400368	0.00509452	0.0307189
GOTERM_BP_FAT	GO:0006396	RNA processing	4.24318	5.71237e-05	RPL14, GAR1, RBM3, DICER1, PNPT1, PUS7L, SBDS, WDR36, DKC1, CTU1, PRMT5, TRMT6, QTRTD1, SBDSP1, NPM3, MAGOHB, IMP4, NSUN2, GEMIN5, MRPL1, RRP9, MBNL1, TRMT61A, MRM1, NOP14, DDX56, PA2G4, NOP2, NOLC1, POP1, WDR4, NOP58, SNRPC, NOP56, PES1, DDX54, SNRPF, SNRPE, RPP40, ADAR	480	547	13528	2.00941	0.124474	0.0146615	0.0999031
GOTERM_BP_FAT	GO:0065003	macromolecular complex assembly	4.01341	9.69583e-05	CAV2, CAV1, CAPZA2, DICER1, TAF9B, IDE, SKAP2, MIF, MTMR2, KCNQ5, HIST1H2BN, PAK2, HIST1H2BK, HIST1H2BL, PRMT5, TGM2, H2AFX, NRG1, MYC, GTF3C4, TUBB3, DCTPP1, GEMIN5, IRAK1, HSP90AA1, TSR1, MAGI1, HIST1H2BF, CREBBP, EPRS, FADD, MBNL1, HMGA1, GAS7, IRS1, ADRB2, PRLR, HIST1H2AI, TOMM22, SNRPC, HSPD1, SNRPF, KPNA3, SNRPE	480	665	13528	1.86476	0.201989	0.0223107	0.169514
GOTERM_BP_FAT	GO:0043933	macromolecular complex subunit organization	3.67384	0.000211915	CAV2, CAV1, CAPZA2, DICER1, TAF9B, IDE, SKAP2, MIF, MTMR2, KCNQ5, HIST1H2BN, PAK2, HIST1H2BK, SEH1L, HIST1H2BL, PRMT5, TGM2, H2AFX, NRG1, MYC, GTF3C4, TUBB3, DCTPP1, GEMIN5, IRAK1, HSP90AA1, TSR1, MAGI1, HIST1H2BF, CREBBP, EPRS, FADD, MBNL1, HMGA1, GAS7, IRS1, ADRB2, PRLR, HIST1H2AI, TOMM22, SNRPC, HSPD1, SNRPF, KPNA3, SNRPE	480	710	13528	1.78627	0.389318	0.0438443	0.370144
GOTERM_BP_FAT	GO:0007049	cell cycle	3.66831	0.000214628	ZMYND11, SPIN1, NBN, S100A6, MRPL41, LRRCC1, POLA1, UHMK1, PSMB7, SBDS, PSMB6, SEH1L, PSMB3, PSMB2, SBDSP1, H2AFX, TLK1, PPP3CA, PSMD6, CCNA1, MYC, TCF3, NUDC, TUBB3, PINX1, EXO1, RAN, RINT1, SKP2, MND1, CDK6, HMGA2, SUGT1, GAS7, AVPI1, AHR, PA2G4, TEX15, EP300, NOLC1, RIF1, PLK2, CCND3, PSMC4, PTP4A1, RNF2, RRS1, PES1, MCTS1	480	776	13528	1.7433	0.393162	0.04077	0.374874
GOTERM_BP_FAT	GO:0009303	rRNA transcription	3.49692	0.000318478	GTF3A, POLR1E, TCOF1, GTF3C6, NPM3, GTF3C4	480	18	13528	9.39444	0.523466	0.0554216	0.555784
GOTERM_BP_FAT	GO:0034621	cellular macromolecular complex subunit organization	3.38295	0.000414044	CAV2, CAV1, HSP90AA1, TSR1, HIST1H2BF, DICER1, MBNL1, HMGA1, GAS7, ADRB2, HIST1H2BN, PRLR, HIST1H2BK, PAK2, SEH1L, HIST1H2BL, PRMT5, HIST1H2AI, H2AFX, TOMM22, SNRPC, HSPD1, NRG1, SNRPF, SNRPE, TUBB3, GEMIN5	480	357	13528	2.13151	0.618513	0.0665186	0.72199
GOTERM_BP_FAT	GO:0034622	cellular macromolecular complex assembly	3.01435	0.000967494	CAV2, CAV1, HSP90AA1, TSR1, HIST1H2BF, DICER1, MBNL1, GAS7, ADRB2, HIST1H2BN, PRLR, HIST1H2BK, HIST1H2BL, PRMT5, HIST1H2AI, TOMM22, H2AFX, SNRPC, HSPD1, SNRPF, NRG1, SNRPE, TUBB3, GEMIN5	480	318	13528	2.12704	0.894859	0.131318	1.6794
GOTERM_BP_FAT	GO:0009451	RNA modification	2.85474	0.0013972	PUS7L, DKC1, CTU1, QTRTD1, WDR4, TRMT61A, NSUN2, ADAR	480	48	13528	4.69722	0.961364	0.157381	2.41674
GOTERM_BP_FAT	GO:0006400	tRNA modification	2.69634	0.00201213	CTU1, QTRTD1, WDR4, TRMT61A, NSUN2	480	16	13528	8.80729	0.990785	0.184358	3.46282
GOTERM_BP_FAT	GO:0030036	actin cytoskeleton organization	2.5446	0.00285364	ALDOA, LIMA1, EPB41, ROCK2, CAPZA2, DIAPH3, LMO7, TMSB10, FHDC1, TPM1, GAS7, PFN1, EZR, EPS8, PAK2, RAC3, ADD2, ARHGDIB	480	226	13528	2.24469	0.998706	0.233558	4.87725
GOTERM_BP_FAT	GO:0000278	mitotic cell cycle	2.49072	0.00323058	RAN, POLA1, SKP2, LRRCC1, CDK6, HMGA2, SUGT1, PSMB7, PSMB6, NOLC1, PSMC4, PLK2, SEH1L, RNF2, PSMB3, PSMB2, RRS1, PPP3CA, PES1, CCNA1, PSMD6, TCF3, TUBB3, NUDC, PINX1	480	370	13528	1.90428	0.999463	0.243368	5.50445
GOTERM_BP_FAT	GO:0070271	protein complex biogenesis	2.40502	0.00393528	CAV2, CAV1, CAPZA2, IDE, TAF9B, SKAP2, MIF, MTMR2, KCNQ5, PAK2, TGM2, NRG1, MYC, DCTPP1, TUBB3, GTF3C4, GEMIN5, IRAK1, HSP90AA1, MAGI1, CREBBP, EPRS, FADD, HMGA1, GAS7, IRS1, ADRB2, PRLR, TOMM22, HSPD1, KPNA3	480	505	13528	1.73007	0.999896	0.263502	6.66659
GOTERM_BP_FAT	GO:0006461	protein complex assembly	2.40502	0.00393528	CAV2, CAV1, CAPZA2, IDE, TAF9B, SKAP2, MIF, MTMR2, KCNQ5, PAK2, TGM2, NRG1, MYC, DCTPP1, TUBB3, GTF3C4, GEMIN5, IRAK1, HSP90AA1, MAGI1, CREBBP, EPRS, FADD, HMGA1, GAS7, IRS1, ADRB2, PRLR, TOMM22, HSPD1, KPNA3	480	505	13528	1.73007	0.999896	0.263502	6.66659
GOTERM_BP_FAT	GO:0051276	chromosome organization	2.37718	0.00419583	NBN, NR3C1, POT1, CHD7, HIST1H2BN, DKC1, BRPF3, HIST1H2BK, SEH1L, HIST1H2BL, PRMT5, TLK1, H2AFX, PINX1, CPA4, TBL1XR1, HIST1H2BF, CREBBP, ARID1B, HMGA2, HMGA1, TEX15, EP300, RNF2, ASH1L, HIST1H2AI, SETD7, RRS1, RUVBL2, NSD1	480	485	13528	1.7433	0.999944	0.270664	7.09285
GOTERM_BP_FAT	GO:0030518	steroid hormone receptor signaling pathway	2.37528	0.00421426	NCOA2, GRIP1, RAN, DNAJA1, FHL2, NR3C1, DDX54, NRIP1	480	58	13528	3.88736	0.999946	0.264425	7.12292
GOTERM_BP_FAT	GO:0060537	muscle tissue development	2.31798	0.00480861	CAV2, CAV1, EP300, DNER, TNC, PDGFRB, FOXC1, PPP3CA, MKL2, MBNL1, NRG1, TPM1	480	125	13528	2.7056	0.999987	0.288157	8.08812
GOTERM_BP_FAT	GO:0008033	tRNA processing	2.27314	0.00533167	PUS7L, CTU1, TRMT6, QTRTD1, WDR4, POP1, TRMT61A, NSUN2, RPP40	480	76	13528	3.3375	0.999996	0.299127	8.92972
GOTERM_BP_FAT	GO:0042113	B cell activation	2.27314	0.00533167	EXO1, NBN, ONECUT1, BCL3, ITGA4, HSPD1, SKAP2, TCF3, NHEJ1	480	76	13528	3.3375	0.999996	0.299127	8.92972
GOTERM_BP_FAT	GO:0006418	tRNA aminoacylation for protein translation	2.26918	0.00538044	FARSB, EPRS, MARS2, LARS2, FARSA, VARS, TARSL2	480	46	13528	4.28877	0.999996	0.294413	9.00781
GOTERM_BP_FAT	GO:0043038	amino acid activation	2.26918	0.00538044	FARSB, EPRS, MARS2, LARS2, FARSA, VARS, TARSL2	480	46	13528	4.28877	0.999996	0.294413	9.00781
GOTERM_BP_FAT	GO:0043039	tRNA aminoacylation	2.26918	0.00538044	FARSB, EPRS, MARS2, LARS2, FARSA, VARS, TARSL2	480	46	13528	4.28877	0.999996	0.294413	9.00781
GOTERM_BP_FAT	GO:0030029	actin filament-based process	2.2625	0.0054639	ALDOA, LIMA1, EPB41, ROCK2, CAPZA2, DIAPH3, LMO7, TMSB10, FHDC1, TPM1, GAS7, PFN1, EZR, EPS8, PAK2, RAC3, ADD2, ARHGDIB	480	241	13528	2.10498	0.999997	0.29148	9.14132
GOTERM_BP_FAT	GO:0022402	cell cycle process	2.22155	0.00600418	NBN, LRRCC1, POLA1, UHMK1, PSMB7, SBDS, PSMB6, SEH1L, PSMB3, PSMB2, SBDSP1, H2AFX, PPP3CA, CCNA1, PSMD6, MYC, TCF3, TUBB3, NUDC, PINX1, EXO1, RAN, SKP2, MND1, CDK6, HMGA2, SUGT1, GAS7, PA2G4, TEX15, NOLC1, PSMC4, RRS1, PES1	480	565	13528	1.64611	0.999999	0.308426	10.0011
GOTERM_BP_FAT	GO:0010033	response to organic substance	2.03495	0.0092268	CAV2, ADCY1, CAV1, LDLR, IL6ST, RBM3, DICER1, PPARG, TAF9B, FHL2, NR3C1, VARS, MANF, GLRX2, HSPH1, PRKAR2A, EIF4EBP2, DNAJA1, CHRNA7, PPP3CA, MYC, NUDC, HSPA8, IRAK1, HSP90AA1, CYP11A1, SOCS3, LIFR, GAL, IRS1, DUSP4, NME2, EP300, EPS8, TFRC, PRKAR1A, GNB4, CA2, HSPD1	480	721	13528	1.52448	1	0.416821	14.9722
GOTERM_BP_FAT	GO:0014706	striated muscle tissue development	2.01728	0.00960982	CAV2, CAV1, EP300, DNER, TNC, FOXC1, PPP3CA, MKL2, MBNL1, NRG1, TPM1	480	119	13528	2.60518	1	0.421926	15.5455
GOTERM_BP_FAT	GO:0007266	Rho protein signal transduction	1.98157	0.0104334	CDC42EP1, ARHGAP5, RHOD, ARHGAP29, ARHGDIA, ARHGDIB	480	38	13528	4.45	1	0.440716	16.766
GOTERM_BP_FAT	GO:0022618	ribonucleoprotein complex assembly	1.96419	0.0108595	TSR1, PRMT5, DICER1, SNRPC, MBNL1, SNRPF, SNRPE, GEMIN5	480	69	13528	3.26763	1	0.446166	17.3908
GOTERM_BP_FAT	GO:0048771	tissue remodeling	1.85751	0.0138832	CAV1, ADRB2, MITF, TGM2, SEMA3C, FOXC1, ITGA4	480	56	13528	3.52292	1	0.522588	21.6997
GOTERM_BP_FAT	GO:0006325	chromatin organization	1.80695	0.0155972	CPA4, TBL1XR1, HIST1H2BF, CREBBP, NR3C1, ARID1B, HMGA2, HMGA1, EP300, CHD7, HIST1H2BN, HIST1H2BK, BRPF3, HIST1H2BL, RNF2, PRMT5, ASH1L, HIST1H2AI, SETD7, H2AFX, TLK1, RUVBL2, NSD1	480	378	13528	1.71486	1	0.548523	24.0471
GOTERM_BP_FAT	GO:0000387	spliceosomal snRNP biogenesis	1.79053	0.0161983	PRMT5, SNRPC, SNRPF, SNRPE, GEMIN5	480	28	13528	5.03274	1	0.554499	24.8546
GOTERM_BP_FAT	GO:0007595	lactation	1.79053	0.0161983	CAV2, CAV1, NME2, PRLR, HK2	480	28	13528	5.03274	1	0.554499	24.8546
GOTERM_BP_FAT	GO:0030522	intracellular receptor-mediated signaling pathway	1.77744	0.0166941	NCOA2, GRIP1, RAN, DNAJA1, FHL2, NR3C1, DDX54, NRIP1	480	75	13528	3.00622	1	0.557868	25.5144
GOTERM_BP_FAT	GO:0007171	activation of transmembrane receptor protein tyrosine kinase activity	1.76772	0.0170717	ADRB2, PRLR, NRG1	480	6	13528	14.0917	1	0.558568	26.0133
GOTERM_BP_FAT	GO:0007517	muscle organ development	1.74398	0.0180311	POU6F1, CAV2, CAV1, FKTN, TNC, MBNL1, TPM1, EP300, DNER, PDGFRB, FOXC1, PPP3CA, MKL2, NRG1, TCF12	480	211	13528	2.00355	1	0.571226	27.2668
GOTERM_BP_FAT	GO:0032268	regulation of cellular protein metabolic process	1.74264	0.0180869	CAV1, AURKAIP1, IL6ST, IMPACT, IDE, EIF5, KITLG, EIF5A, PRKAR2A, PSMB7, PSMB6, EIF4EBP2, MDFIC, MAP3K2, PSMB3, MTPN, TRMT6, PSMB2, BCL3, PSMD6, SOCS3, PA2G4, EP300, PSMC4, CCND3, PRKAR1A, PDGFRB	480	474	13528	1.60538	1	0.565175	27.339
GOTERM_BP_FAT	GO:0018205	peptidyl-lysine modification	1.68354	0.0207235	EP300, CREBBP, TGM2, EIF5A	480	17	13528	6.63137	1	0.601258	30.6783
GOTERM_BP_FAT	GO:0048732	gland development	1.66374	0.0216901	CAV2, CAV1, NME2, HOXA13, PRLR, ALDH1A3, HK2, FOXC1, NR3C1, NRG1, IRS1	480	135	13528	2.29642	1	0.604572	31.8658
GOTERM_BP_FAT	GO:0008283	cell proliferation	1.65897	0.0219296	ZMYND11, NBN, POLA1, HDGF, KITLG, EHF, MIF, SBDS, DKC1, PRMT5, SBDSP1, IFRD2, NRG1, MYC, NUDC, CREBBP, SKP2, PA2G4, CCND3, EPS8, RASGRF1, TXN, RAP1B, FOXC1, HSPD1, PES1	480	436	13528	1.61602	1	0.602036	32.1571
GOTERM_BP_FAT	GO:0033043	regulation of organelle organization	1.64723	0.0225304	CAV2, CAV1, LIMA1, AURKAIP1, HOXA13, ROCK2, CAPZA2, TMSB10, TPM1, POT1, SBDS, PRMT5, SBDSP1, TLK1, MYC, ADD2	480	217	13528	1.94816	1	0.60557	32.8826
GOTERM_BP_FAT	GO:0022406	membrane docking	1.63989	0.0229144	CAV2, EZR, SCFD2, EXOC5, EXOC6B	480	31	13528	4.5457	1	0.605461	33.3424
GOTERM_BP_FAT	GO:0006474	N-terminal protein amino acid acetylation	1.6318	0.0233451	EP300, CREBBP, NAA15	480	7	13528	12.0786	1	0.606103	33.8547
GOTERM_BP_FAT	GO:0030879	mammary gland development	1.62592	0.0236637	CAV2, CAV1, NME2, PRLR, HK2, NRG1, IRS1	480	63	13528	3.13148	1	0.604968	34.2312
GOTERM_BP_FAT	GO:0051340	regulation of ligase activity	1.61159	0.0244573	PSMB7, PSMB6, PSMC4, PSMB3, PSMB2, PSMD6, NHEJ1, GCLM	480	81	13528	2.78354	1	0.605189	35.1603
GOTERM_BP_FAT	GO:0009266	response to temperature stimulus	1.56039	0.0275177	ADRB2, STAC, SOCS3, RBM3, PPARG, PCSK1N, MYOF, GLRX2	480	83	13528	2.71647	1	0.643226	38.6288
GOTERM_BP_FAT	GO:0060538	skeletal muscle organ development	1.53773	0.0289911	CAV2, CAV1, EP300, DNER, TNC, PPP3CA, MBNL1	480	66	13528	2.98914	1	0.656882	40.2356
GOTERM_BP_FAT	GO:0007519	skeletal muscle tissue development	1.53773	0.0289911	CAV2, CAV1, EP300, DNER, TNC, PPP3CA, MBNL1	480	66	13528	2.98914	1	0.656882	40.2356
GOTERM_BP_FAT	GO:0006596	polyamine biosynthetic process	1.51704	0.030406	ODC1, SRM, AMD1	480	8	13528	10.5687	1	0.66893	41.7411
GOTERM_BP_FAT	GO:0051972	regulation of telomerase activity	1.51704	0.030406	PPARG, POT1, PINX1	480	8	13528	10.5687	1	0.66893	41.7411
GOTERM_BP_FAT	GO:0007265	Ras protein signal transduction	1.48502	0.0327325	CDC42EP1, ARHGAP5, RREB1, SOS1, SHOC2, RHOD, ARHGAP29, ARHGDIA, ARHGDIB	480	105	13528	2.41571	1	0.69068	44.1393
GOTERM_BP_FAT	GO:0043632	modification-dependent macromolecule catabolic process	1.46207	0.0345087	KIAA0368, SUMO3, PSMB7, PSMB6, ZYG11A, PSMB3, PSMB2, FBXO28, USP37, OTUD7A, FBXO21, PSMD6, FBXL17, TRIP12, USP13, TBL1XR1, DTL, SOCS3, HERC6, SKP2, SOCS4, SUGT1, ATE1, UBR7, PSMC4, RNF2, MIB2, KLHL13, SPOPL, USP45	480	574	13528	1.473	1	0.704682	45.9072
GOTERM_BP_FAT	GO:0019941	modification-dependent protein catabolic process	1.46207	0.0345087	KIAA0368, SUMO3, PSMB7, PSMB6, ZYG11A, PSMB3, PSMB2, FBXO28, USP37, OTUD7A, FBXO21, PSMD6, FBXL17, TRIP12, USP13, TBL1XR1, DTL, SOCS3, HERC6, SKP2, SOCS4, SUGT1, ATE1, UBR7, PSMC4, RNF2, MIB2, KLHL13, SPOPL, USP45	480	574	13528	1.473	1	0.704682	45.9072
GOTERM_BP_FAT	GO:0030163	protein catabolic process	1.46109	0.0345866	KIAA0368, IDE, SUMO3, PSMB7, PSMB6, ZYG11A, PSMB3, PSMB2, FBXO28, USP37, OTUD7A, PSMD6, FBXO21, TPRKB, FBXL17, TRIP12, USP13, TBL1XR1, DTL, SOCS3, HERC6, SKP2, SOCS4, SUGT1, ATE1, UBR7, PSMC4, RNF2, MIB2, KLHL13, SPOPL, USP45	480	622	13528	1.44995	1	0.700166	45.9835
GOTERM_BP_FAT	GO:0040008	regulation of growth	1.46053	0.0346315	NRP1, ENOX2, CCDC85B, TNFRSF12A, SOCS3, PPARG, GDF5, TAF9B, SOCS4, HMGA2, ADRB2, EP300, CHD7, PAK2, FOXC1, RUVBL2, PCSK1N, NRG1, MCTS1, BRMS1L	480	341	13528	1.65298	1	0.695364	46.0274
GOTERM_BP_FAT	GO:0006473	protein amino acid acetylation	1.44111	0.0362154	CPA4, EP300, BRPF3, CREBBP, NAA15, RUVBL2	480	52	13528	3.25192	1	0.701497	47.5561
GOTERM_BP_FAT	GO:0051603	proteolysis involved in cellular protein catabolic process	1.4401	0.0362992	KIAA0368, IDE, SUMO3, PSMB7, PSMB6, ZYG11A, PSMB3, PSMB2, FBXO28, USP37, OTUD7A, PSMD6, FBXO21, FBXL17, TRIP12, USP13, TBL1XR1, DTL, SOCS3, HERC6, SKP2, SOCS4, SUGT1, ATE1, UBR7, PSMC4, RNF2, MIB2, KLHL13, SPOPL, USP45	480	600	13528	1.45614	1	0.697294	47.6358
GOTERM_BP_FAT	GO:0051017	actin filament bundle formation	1.43733	0.0365319	LIMA1, EZR, GAS7, ADD2	480	21	13528	5.36825	1	0.694657	47.8566
GOTERM_BP_FAT	GO:0009409	response to cold	1.43733	0.0365319	ADRB2, RBM3, PPARG, PCSK1N	480	21	13528	5.36825	1	0.694657	47.8566
GOTERM_BP_FAT	GO:0006350	transcription	1.43314	0.0368859	GTF3A, POU6F1, HMX1, ZNF532, TCOF1, MITF, PPARG, NAA15, CNOT6, CITED4, CBFB, GTF2IRD2B, CDCA7, MIER1, MDFIC, ZNF148, PRMT5, ZNF732, MKL2, MYC, TWIST2, TBL1XR1, POLR1E, RREB1, POLR1A, POLR1B, ARID1B, HMGA2, GRHL2, HMGA1, AHR, NRIP1, ZNF718, PA2G4, NME2, EP300, NCOA2, ASH1L, MGA, FOXC1, RUVBL2, DNTTIP2, NSD1, MYBBP1A, MCTS1, ZMYND11, ZNF469, ONECUT1, HOXA13, TFAP4, TAF9B, HDGF, FHL2, EHF, NR3C1, MY…	480	2101	13528	1.20728	1	0.693288	48.1908
GOTERM_BP_FAT	GO:0030521	androgen receptor signaling pathway	1.42717	0.0373964	GRIP1, RAN, DNAJA1, FHL2, NRIP1	480	36	13528	3.91435	1	0.6935	48.6692
GOTERM_BP_FAT	GO:0007080	mitotic metaphase plate congression	1.41804	0.0381908	SEH1L, RRS1, PINX1	480	9	13528	9.39444	1	0.696464	49.4054
GOTERM_BP_FAT	GO:0035150	regulation of tube size	1.41038	0.0388709	CAV2, CAV1, ADRB2, ADORA2B, FOXC1, GCLM	480	53	13528	3.19057	1	0.698248	50.0277
GOTERM_BP_FAT	GO:0050880	regulation of blood vessel size	1.41038	0.0388709	CAV2, CAV1, ADRB2, ADORA2B, FOXC1, GCLM	480	53	13528	3.19057	1	0.698248	50.0277
GOTERM_BP_FAT	GO:0006518	peptide metabolic process	1.41038	0.0388709	MRPS26, MRPS9, SEC11C, IDE, GCLM, GLRX2	480	53	13528	3.19057	1	0.698248	50.0277
GOTERM_BP_FAT	GO:0006986	response to unfolded protein	1.40324	0.0395144	HSPH1, HSP90AA1, DNAJA1, HSPD1, VARS, HSPA8, MANF	480	71	13528	2.77864	1	0.699639	50.6099
GOTERM_BP_FAT	GO:0044257	cellular protein catabolic process	1.40272	0.0395619	KIAA0368, IDE, SUMO3, PSMB7, PSMB6, ZYG11A, PSMB3, PSMB2, FBXO28, USP37, OTUD7A, PSMD6, FBXO21, FBXL17, TRIP12, USP13, TBL1XR1, DTL, SOCS3, HERC6, SKP2, SOCS4, SUGT1, ATE1, UBR7, PSMC4, RNF2, MIB2, KLHL13, SPOPL, USP45	480	603	13528	1.44889	1	0.695474	50.6526
GOTERM_BP_FAT	GO:0007242	intracellular signaling cascade	1.37972	0.0417143	ADCY1, NBN, IL6ST, GRIP1, SHOC2, PRKAR2A, ARHGAP5, EIF4EBP2, STAC, MDFIC, AEN, H2AFX, CHRNA7, TLK1, RHOD, TUBB3, IRAK1, TNIK, PTGER4, RREB1, ROCK2, RAN, SOCS3, RINT1, SOCS4, ARHGAP29, IRS1, NRIP1, ADRB2, NCOA2, RASGRF1, GNB4, ERC1, CAV1, ADORA2B, FHL2, AKAP11, NR3C1, CDC42EP1, RAC3, MAP3K2, HRH2, SOS1, TGM2, DNAJA1, BCL3, ARHGDIA, ARHGDIB, DUSP4, PDZD8, RPS6KA4, RASL11A, PRLR, PRKAR1A, RAP1B, DDX…	480	1256	13528	1.27902	1	0.710441	52.5523
GOTERM_BP_FAT	GO:0006006	glucose metabolic process	1.34212	0.0454865	ALDOA, GPD1, LDHA, SORD, ONECUT1, PYGL, IL6ST, HK2, PHKA1P1, MYC, AGL	480	153	13528	2.02625	1	0.737475	55.7163
GOTERM_BP_FAT	GO:0001974	blood vessel remodeling	1.33539	0.0461965	TGM2, SEMA3C, FOXC1, ITGA4	480	23	13528	4.90145	1	0.738733	56.2891
GOTERM_BP_FAT	GO:0022900	electron transport chain	1.30681	0.0493391	NDUFS6, ENOX2, SLC25A13, NDUFB10, NDUFA6, TXN, NDUFAB1, GLRX2, ENOX1	480	114	13528	2.225	1	0.75794	58.7417

## Sheet: Intermediate stage
Table SIII-C. DAVID_GO_BP for DEGs in intermediate stage of irradiation (P<0.05).
Category	Term		-log(pvalue)	PValue	Genes	List Total	Pop Hits	Pop Total	Fold Enrichment	Bonferroni	Benjamini	FDR
GOTERM_BP_FAT	GO:0007155	cell adhesion	9.49331	3.21133e-10	AEBP1, CADM4, CLDN4, FERMT3, NELL2, NEDD9, IL32, ITGB2, CDH2, EDIL3, SOX9, CDSN, CDH4, CDH5, CD9, LAMB3, PCDH1, S1PR1, CD44, ITGAX, ITGAV, ITGB6, COL6A1, CNTNAP1, SCARB2, LAMB1, ADAM8, GPNMB, LOXL2, ADAM9, OLR1, ITGA2, ITGA3, MFGE8, MCAM, RND3, AMIGO2, LAMA1, LAMA4, LAMA3, DSG3, ROCK1P1, CLDN1, SUSD5, LAMC2, TGFB1I1, COL20A1	323	700	13528	2.8121	6.73417e-07	6.73417e-07	5.55185e-07
GOTERM_BP_FAT	GO:0022610	biological adhesion	9.4802	3.30977e-10	AEBP1, CADM4, CLDN4, FERMT3, NELL2, NEDD9, IL32, ITGB2, CDH2, EDIL3, SOX9, CDSN, CDH4, CDH5, CD9, LAMB3, PCDH1, S1PR1, CD44, ITGAX, ITGAV, ITGB6, COL6A1, CNTNAP1, SCARB2, LAMB1, ADAM8, GPNMB, LOXL2, ADAM9, OLR1, ITGA2, ITGA3, MFGE8, MCAM, RND3, AMIGO2, LAMA1, LAMA4, LAMA3, DSG3, ROCK1P1, CLDN1, SUSD5, LAMC2, TGFB1I1, COL20A1	323	701	13528	2.80809	6.94059e-07	3.47029e-07	5.72203e-07
GOTERM_BP_FAT	GO:0030334	regulation of cell migration	7.68962	2.04351e-08	IL6, IRS2, EDN2, ITGA2, NEXN, NTN1, TRIB1, TGFB2, CITED2, LAMA1, IGF1R, LAMA4, ACE, LAMA3, S1PR1, F3, HBEGF, LAMB1, HDAC9, ADAM9	323	169	13528	4.95649	4.28515e-05	1.4284e-05	3.53288e-05
GOTERM_BP_FAT	GO:0051270	regulation of cell motion	7.45806	3.48293e-08	IL6, IRS2, EDN2, ITGA2, CHST3, NEXN, NTN1, TRIB1, TGFB2, CITED2, LAMA1, IGF1R, LAMA4, ACE, LAMA3, S1PR1, F3, HBEGF, LAMB1, HDAC9, ADAM9	323	193	13528	4.55715	7.30343e-05	1.82591e-05	6.02138e-05
GOTERM_BP_FAT	GO:0009611	response to wounding	6.36627	4.30259e-07	NDST1, CXCL2, TLR1, ITGB2, TIMP3, IL11, TGFB2, CD9, HRH1, CD44, SAA1, SERPINE1, ITGB6, CFH, MGLL, TFPI2, KLF6, IL6, OLR1, CYP1A1, MAP1B, ANXA1, ITGA2, CHST3, CYP4F11, C4BPB, CD55, EREG, F3, HBEGF, ID3, PLA2G4C, HDAC9, PLAU	323	530	13528	2.68679	0.000901847	0.000150364	0.000743842
GOTERM_BP_FAT	GO:0042127	regulation of cell proliferation	6.14328	7.18991e-07	PPP2R3B, STAT5A, EDN2, BTC, MMP7, SOX9, TIMP2, CDH5, IL11, TGFB2, TRIB1, LIF, IGF1R, CD9, S1PR1, PTGES, SERPINE1, KRT4, LAMB1, GPNMB, FOSL1, FGFBP1, LTB, EBI3, IRS2, IL6, GNRH1, ANXA1, ITGA2, MFGE8, NTN1, TNFRSF9, LAMA1, CTH, ATF3, EREG, EPGN, F3, FABP3, HBEGF, TGFB1I1, EMP3, PLAU	323	787	13528	2.28836	0.00150659	0.000215366	0.00124301
GOTERM_BP_FAT	GO:0008544	epidermis development	5.72196	1.89688e-06	TCHH, FST, ANXA1, KRT13, SOX9, CDSN, SCEL, TGFB2, LAMB3, LAMA3, KRT17, EREG, KRT16, LAMC2, LTB, IVL, EMP1, ADAM9	323	184	13528	4.09719	0.00396986	0.000441876	0.00327933
GOTERM_BP_FAT	GO:0007398	ectoderm development	5.25776	5.52378e-06	TCHH, FST, ANXA1, KRT13, SOX9, CDSN, SCEL, TGFB2, LAMB3, LAMA3, KRT17, EREG, KRT16, LAMC2, LTB, IVL, EMP1, ADAM9	323	199	13528	3.78835	0.0115166	0.00105248	0.00954923
GOTERM_BP_FAT	GO:0030855	epithelial cell differentiation	4.63162	2.33551e-05	TCHH, ANXA1, CDSN, SCEL, LAMA1, S1PR1, LAMA3, EREG, ID3, KRT4, TGFB1I1, IVL, EMP1, ADAM9	323	137	13528	4.27995	0.0477963	0.00349219	0.0403693
GOTERM_BP_FAT	GO:0042060	wound healing	4.27925	5.25717e-05	KLF6, IL6, ITGA2, C4BPB, TIMP3, IL11, TGFB2, CD9, EREG, CD44, SAA1, F3, SERPINE1, HBEGF, TFPI2, PLAU	323	191	13528	3.50847	0.104386	0.00732277	0.0908485
GOTERM_BP_FAT	GO:0007167	enzyme linked receptor protein signaling pathway	4.14496	7.16213e-05	IRS2, NDST1, PTPRG, STAT5A, MET, FST, AXL, TRIO, EPHA10, FSTL1, EPHA2, TGFB2, LIF, IGF1R, EIF4EBP1, EREG, ARF4, HBEGF, AREG, TGFB1I1, GDF15, ADAM9	323	342	13528	2.69419	0.13946	0.00934328	0.123749
GOTERM_BP_FAT	GO:0060429	epithelium development	3.96384	0.000108683	TCHH, DAG1, ANXA1, CDSN, SCEL, SHANK3, LAMA1, LAMA3, S1PR1, EREG, CD44, ID3, KRT4, TGFB1I1, IVL, EMP1, ADAM9	323	227	13528	3.13656	0.203813	0.0133177	0.187729
GOTERM_BP_FAT	GO:0007229	integrin-mediated signaling pathway	3.60712	0.000247104	ITGAX, ITGAV, ITGB6, ITGA2, NEDD9, ITGB2, ITGA3, ADAM8, ADAM9	323	70	13528	5.38487	0.404433	0.0283807	0.426342
GOTERM_BP_FAT	GO:0007596	blood coagulation	3.14199	0.000721125	CD9, IL6, SAA1, F3, SERPINE1, ITGA2, C4BPB, TFPI2, PLAU, IL11	323	102	13528	4.10611	0.779695	0.0695021	1.23941
GOTERM_BP_FAT	GO:0006952	defense response	3.11079	0.000774828	NDST1, TLR1, CXCL2, NLRX1, ITGB2, IL32, ANKRD1, TAPBP, HRH1, CD44, SAA1, ITGB6, CFH, MGLL, FOSL1, CRISP3, IL6, OLR1, HCK, ANXA1, CYP4F11, C4BPB, INHBA, PSG9, CD55, PSG8, F3, PLA2G4C, HDAC9	323	615	13528	1.97494	0.803176	0.0712204	1.33113
GOTERM_BP_FAT	GO:0001568	blood vessel development	3.10134	0.000791875	CDH2, ARHGAP24, GJA5, CDH5, TGFB2, CITED2, ZFP36L1, LAMA4, ACE, S1PR1, CD44, EREG, EPGN, ITGAV, TNFAIP2, PLAU	323	245	13528	2.73517	0.810093	0.0696803	1.36022
GOTERM_BP_FAT	GO:0006954	inflammatory response	3.09889	0.000796368	IL6, OLR1, NDST1, CXCL2, TLR1, ANXA1, C4BPB, ITGB2, CYP4F11, CD55, HRH1, CD44, SAA1, F3, ITGB6, CFH, MGLL, PLA2G4C, HDAC9	323	325	13528	2.44851	0.811875	0.0672428	1.36789
GOTERM_BP_FAT	GO:0030216	keratinocyte differentiation	3.0233	0.000947759	TCHH, LAMA3, EREG, ANXA1, CDSN, IVL, SCEL, ADAM9	323	66	13528	5.07665	0.863085	0.0736255	1.62593
GOTERM_BP_FAT	GO:0001944	vasculature development	2.99566	0.00101004	CDH2, ARHGAP24, GJA5, CDH5, TGFB2, CITED2, ZFP36L1, LAMA4, ACE, S1PR1, CD44, EREG, EPGN, ITGAV, TNFAIP2, PLAU	323	251	13528	2.66979	0.879864	0.0754854	1.7319
GOTERM_BP_FAT	GO:0007599	hemostasis	2.96345	0.00108781	CD9, IL6, SAA1, F3, SERPINE1, ITGA2, C4BPB, TFPI2, PLAU, IL11	323	108	13528	3.878	0.897958	0.0732571	1.86406
GOTERM_BP_FAT	GO:0009913	epidermal cell differentiation	2.79913	0.00158807	TCHH, LAMA3, EREG, ANXA1, CDSN, IVL, SCEL, ADAM9	323	72	13528	4.65359	0.964308	0.101933	2.71027
GOTERM_BP_FAT	GO:0050878	regulation of body fluid levels	2.69839	0.00200265	CD9, IL6, SAA1, F3, SERPINE1, NPR1, ITGA2, C4BPB, TFPI2, PLAU, IL11	323	141	13528	3.26742	0.985061	0.123105	3.40635
GOTERM_BP_FAT	GO:0006928	cell motion	2.64516	0.00226379	IL6, EDN2, VIM, EMX2, MET, ANXA1, ITGA2, ITGB2, CDH2, CDH4, NTN1, TPM4, TGFB2, CD9, LAMA1, CD44, ROCK1P1, SAA1, HBEGF, HSPB1, SEMA3B, PLAU, S100A2	323	475	13528	2.02799	0.99137	0.134127	3.84237
GOTERM_BP_FAT	GO:0016337	cell-cell adhesion	2.58985	0.00257128	OLR1, CLDN4, ITGB2, CDH2, SOX9, CDH4, CDSN, CDH5, AMIGO2, PCDH1, CD44, ROCK1P1, DSG3, CLDN1, ADAM8, ADAM9	323	276	13528	2.42796	0.995479	0.146826	4.35342
GOTERM_BP_FAT	GO:0046942	carboxylic acid transport	2.56558	0.00271909	SLC1A4, ACE, SLC38A2, SERINC1, SLC16A8, ANXA1, FABP3, SLC43A1, SLC7A5, SLC7A11, SLC7A7	323	147	13528	3.13405	0.996686	0.150523	4.59817
GOTERM_BP_FAT	GO:0007169	transmembrane receptor protein tyrosine kinase signaling pathway	2.55581	0.0027809	IGF1R, EIF4EBP1, IRS2, EREG, NDST1, PTPRG, STAT5A, ARF4, MET, AXL, HBEGF, EPHA10, AREG, EPHA2	323	224	13528	2.61765	0.99709	0.14974	4.70034
GOTERM_BP_FAT	GO:0015849	organic acid transport	2.5442	0.00285627	SLC1A4, ACE, SLC38A2, SERINC1, SLC16A8, ANXA1, FABP3, SLC43A1, SLC7A5, SLC7A11, SLC7A7	323	148	13528	3.11288	0.997517	0.149655	4.82479
GOTERM_BP_FAT	GO:0030879	mammary gland development	2.42327	0.00377339	XDH, IGF1R, IRS2, STAT5A, MET, ITGA2, NTN1	323	63	13528	4.65359	0.999639	0.183947	6.32688
GOTERM_BP_FAT	GO:0042445	hormone metabolic process	2.42256	0.00377957	UGT1A6, DHRS3, ACE, ECE1, CYP1B1, CYP1A1, DIO2, SLCO4A1, CHST8	323	106	13528	3.55605	0.999644	0.180056	6.33692
GOTERM_BP_FAT	GO:0048660	regulation of smooth muscle cell proliferation	2.34061	0.00456444	IL6, S1PR1, EREG, HBEGF, ITGA2, TRIB1	323	46	13528	5.46292	0.999932	0.204208	7.6045
GOTERM_BP_FAT	GO:0031099	regeneration	2.2281	0.00591429	LIF, SERPINE1, MAP1B, AXL, CHST3, TIMP3, PLAU	323	69	13528	4.24893	0.999996	0.241509	9.74683
GOTERM_BP_FAT	GO:0050920	regulation of chemotaxis	2.22405	0.00596968	IL6, S1PR1, F3, EDN2, ITGA2	323	31	13528	6.75522	0.999996	0.238873	9.83374
GOTERM_BP_FAT	GO:0051174	regulation of phosphorus metabolic process	2.21172	0.00614155	IL6, EDN2, MET, PIM1, ITGA2, TRIB3, ITGB2, SDC4, IL11, TRIB1, TGFB2, TNFRSF10A, LIF, INHBA, EREG, EPGN, SPRED2, FAM129A, DUSP8, GADD45A, CBS, ADAM9	323	485	13528	1.89982	0.999998	0.240324	10.1029
GOTERM_BP_FAT	GO:0019220	regulation of phosphate metabolic process	2.21172	0.00614155	IL6, EDN2, MET, PIM1, ITGA2, TRIB3, ITGB2, SDC4, IL11, TRIB1, TGFB2, TNFRSF10A, LIF, INHBA, EREG, EPGN, SPRED2, FAM129A, DUSP8, GADD45A, CBS, ADAM9	323	485	13528	1.89982	0.999998	0.240324	10.1029
GOTERM_BP_FAT	GO:0006790	sulfur metabolic process	2.20942	0.00617413	CSGALNACT1, GGT5, CTH, NDST1, STAT5A, CHST8, CHST3, SMS, CBS	323	115	13528	3.27775	0.999998	0.237054	10.1538
GOTERM_BP_FAT	GO:0016477	cell migration	2.19049	0.00644924	IL6, EDN2, EMX2, MET, ITGB2, CDH2, NTN1, TGFB2, LAMA1, CD44, ROCK1P1, SAA1, HBEGF, PLAU, S100A2	323	276	13528	2.27621	0.999999	0.241866	10.5828
GOTERM_BP_FAT	GO:0044272	sulfur compound biosynthetic process	2.18494	0.00653222	CSGALNACT1, GGT5, CTH, NDST1, CHST3, CBS	323	50	13528	5.02588	0.999999	0.240322	10.7118
GOTERM_BP_FAT	GO:0051797	regulation of hair follicle development	2.09952	0.00795209	INHBA, FST, TGFB2	323	6	13528	20.9412	1	0.279837	12.8925
GOTERM_BP_FAT	GO:0042634	regulation of hair cycle	2.09952	0.00795209	INHBA, FST, TGFB2	323	6	13528	20.9412	1	0.279837	12.8925
GOTERM_BP_FAT	GO:0042325	regulation of phosphorylation	2.09066	0.00811599	IL6, EDN2, MET, PIM1, TRIB3, ITGB2, SDC4, IL11, TRIB1, TGFB2, TNFRSF10A, LIF, INHBA, EREG, EPGN, SPRED2, FAM129A, DUSP8, GADD45A, CBS, ADAM9	323	466	13528	1.8874	1	0.280089	13.141
GOTERM_BP_FAT	GO:0042035	regulation of cytokine biosynthetic process	2.0818	0.00828331	INHBA, IL6, EREG, STAT5A, TLR1, LTB, EBI3	323	74	13528	3.96184	1	0.280431	13.394
GOTERM_BP_FAT	GO:0030593	neutrophil chemotaxis	2.07772	0.0083615	SAA1, EDN2, ITGB2, TGFB2	323	18	13528	9.30719	1	0.273954	13.5119
GOTERM_BP_FAT	GO:0031589	cell-substrate adhesion	2.05314	0.00884823	CD44, ITGAV, ITGB6, ITGA2, ITGB2, ITGA3, LAMB1, ADAM9	323	98	13528	3.41897	1	0.278895	14.2429
GOTERM_BP_FAT	GO:0051046	regulation of secretion	2.04114	0.00909627	LIF, INHBA, IL6, SAA1, EDN2, BTC, FST, CASP1, SRGN, ADAM9, IL11, TGFB2	323	202	13528	2.48806	1	0.281351	14.6132
GOTERM_BP_FAT	GO:0042981	regulation of apoptosis	2.00947	0.00978438	STAT5A, BTC, ASNS, SOX9, TIMP3, CITED2, TGFB2, IGF1R, PLEKHG2, CD44, CASP1, LTB, FOSL1, ADAM9, IL6, GNRH1, PIM1, ANXA1, TRIO, BIRC3, TNFRSF10A, INHBA, TNFRSF9, AMIGO2, TNFRSF10D, ROCK1P1, F3, HSPB1, ID3, TNFAIP3, IKBKB	323	804	13528	1.61487	1	0.290821	15.6325
GOTERM_BP_FAT	GO:0010817	regulation of hormone levels	1.99396	0.01014	UGT1A6, DHRS3, ACE, IL6, ECE1, CYP1B1, CYP1A1, DIO2, SLCO4A1, CHST8	323	151	13528	2.77367	1	0.295568	16.1549
GOTERM_BP_FAT	GO:0006916	anti-apoptosis	1.97988	0.0104741	IGF1R, AMIGO2, GNRH1, TNFRSF10D, F3, STAT5A, ANXA1, HSPB1, TNFAIP3, IKBKB, BIRC3, CITED2	323	206	13528	2.43975	1	0.299617	16.6427
GOTERM_BP_FAT	GO:0043067	regulation of programmed cell death	1.95215	0.0111648	STAT5A, BTC, ASNS, SOX9, TIMP3, CITED2, TGFB2, IGF1R, PLEKHG2, CD44, CASP1, LTB, FOSL1, ADAM9, IL6, GNRH1, PIM1, ANXA1, TRIO, BIRC3, TNFRSF10A, INHBA, TNFRSF9, AMIGO2, TNFRSF10D, ROCK1P1, F3, HSPB1, ID3, TNFAIP3, IKBKB	323	812	13528	1.59896	1	0.307799	17.6429
GOTERM_BP_FAT	GO:0030595	leukocyte chemotaxis	1.95036	0.0112109	IL6, SAA1, EDN2, ITGB2, TGFB2	323	37	13528	5.65978	1	0.304917	17.7093
GOTERM_BP_FAT	GO:0050900	leukocyte migration	1.94743	0.0112867	IL6, ROCK1P1, SAA1, EDN2, ITGB2, TGFB2	323	57	13528	4.40867	1	0.302775	17.8182
GOTERM_BP_FAT	GO:0001817	regulation of cytokine production	1.941	0.0114551	INHBA, IL6, EREG, SAA1, STAT5A, TLR1, CASP1, LTB, EBI3, SRGN, TGFB2	323	181	13528	2.54534	1	0.302741	18.06
GOTERM_BP_FAT	GO:0010941	regulation of cell death	1.93398	0.0116419	STAT5A, BTC, ASNS, SOX9, TIMP3, CITED2, TGFB2, IGF1R, PLEKHG2, CD44, CASP1, LTB, FOSL1, ADAM9, IL6, GNRH1, PIM1, ANXA1, TRIO, BIRC3, TNFRSF10A, INHBA, TNFRSF9, AMIGO2, TNFRSF10D, ROCK1P1, F3, HSPB1, ID3, TNFAIP3, IKBKB	323	815	13528	1.59307	1	0.303106	18.3272
GOTERM_BP_FAT	GO:0050708	regulation of protein secretion	1.91659	0.0121174	IL6, SAA1, CASP1, SRGN, ADAM9, TGFB2	323	58	13528	4.33266	1	0.309619	19.0038
GOTERM_BP_FAT	GO:0015804	neutral amino acid transport	1.88836	0.0129311	SLC1A4, SERINC1, SLC43A1, SLC7A5	323	21	13528	7.97759	1	0.315505	20.1495
GOTERM_BP_FAT	GO:0060326	cell chemotaxis	1.87111	0.0134553	IL6, SAA1, EDN2, ITGB2, TGFB2	323	39	13528	5.36953	1	0.322361	20.8795
GOTERM_BP_FAT	GO:0032101	regulation of response to external stimulus	1.85764	0.0138792	IL6, S1PR1, SAA1, F3, STAT5A, EDN2, SERPINE1, ITGA2, NT5E, PLAU	323	159	13528	2.63411	1	0.327034	21.4651
GOTERM_BP_FAT	GO:0006935	chemotaxis	1.84134	0.0144099	CCRL2, PLP2, IL6, SAA1, EDN2, CXCL2, ITGB2, FOSL1, PLAU, TGFB2	323	160	13528	2.61765	1	0.330009	22.1927
GOTERM_BP_FAT	GO:0042330	taxis	1.84134	0.0144099	CCRL2, PLP2, IL6, SAA1, EDN2, CXCL2, ITGB2, FOSL1, PLAU, TGFB2	323	160	13528	2.61765	1	0.330009	22.1927
GOTERM_BP_FAT	GO:0042493	response to drug	1.83894	0.0144898	UGT1A6, ACTC1, SLC22A18, CYP1A1, EMX2, MAP1B, FABP3, ITGA2, IKBKB, FOSL1, LIPE, ABCG2	323	216	13528	2.3268	1	0.328002	22.3017
GOTERM_BP_FAT	GO:0045682	regulation of epidermis development	1.83228	0.0147136	MAFF, INHBA, FST, TGFB2	323	22	13528	7.61497	1	0.32868	22.6062
GOTERM_BP_FAT	GO:0048732	gland development	1.8116	0.0154312	XDH, IGF1R, IRS2, STAT5A, MET, ITGA2, NTN1, CITED2, TGFB2	323	135	13528	2.79216	1	0.334784	23.5748
GOTERM_BP_FAT	GO:0051674	localization of cell	1.81142	0.0154377	IL6, EDN2, EMX2, MET, ITGB2, CDH2, NTN1, TGFB2, LAMA1, CD44, ROCK1P1, SAA1, HBEGF, PLAU, S100A2	323	307	13528	2.04637	1	0.331542	23.5836
GOTERM_BP_FAT	GO:0048870	cell motility	1.81142	0.0154377	IL6, EDN2, EMX2, MET, ITGB2, CDH2, NTN1, TGFB2, LAMA1, CD44, ROCK1P1, SAA1, HBEGF, PLAU, S100A2	323	307	13528	2.04637	1	0.331542	23.5836
GOTERM_BP_FAT	GO:0010627	regulation of protein kinase cascade	1.78827	0.0162829	IL6, SLC20A1, TIMP2, TGFB2, IL11, LIF, GPR89B, F3, TNFAIP3, IKBKB, CASP1, LTB, CBS	323	249	13528	2.18663	1	0.339511	24.7098
GOTERM_BP_FAT	GO:0044057	regulation of system process	1.78711	0.0163265	EDN2, BTC, FST, MAP1B, ITGA2, NPR1, CDH2, SDC4, TGFB2, INHBA, ACE, ECE1, HBEGF, CELF2, LTB	323	309	13528	2.03312	1	0.336975	24.7674
GOTERM_BP_FAT	GO:0015807	L-amino acid transport	1.77916	0.0166281	SLC1A4, SERINC1, SLC43A1, SLC7A5	323	23	13528	7.28389	1	0.338784	25.1653
GOTERM_BP_FAT	GO:0006417	regulation of translation	1.77663	0.0167251	ZFP36L1, EIF4EBP1, IL6, DIO2, KRT7, HSPB1, ITGA2, FAM129A, SAMD4A	323	137	13528	2.7514	1	0.337192	25.2928
GOTERM_BP_FAT	GO:0051338	regulation of transferase activity	1.77621	0.0167412	EDN2, MET, PIM1, TRIB3, SDC4, TRIB1, TGFB2, TNFRSF10A, SERINC2, EREG, EPGN, SERINC1, SPRED2, DUSP8, GADD45A, ADAM9, CBS	323	372	13528	1.91398	1	0.334314	25.3139
GOTERM_BP_FAT	GO:0006575	cellular amino acid derivative metabolic process	1.7468	0.0179141	GGT5, CTH, CYP1A1, STAT5A, FABP3, NPR1, SMOX, SMS, PADI1, TGFB2	323	166	13528	2.52303	1	0.346828	26.8393
GOTERM_BP_FAT	GO:0042447	hormone catabolic process	1.73982	0.0182047	ACE, ECE1, DIO2	323	9	13528	13.9608	1	0.342146	27.2127
GOTERM_BP_FAT	GO:0007160	cell-matrix adhesion	1.7128	0.0193733	CD44, ITGAV, ITGB6, ITGA2, ITGB2, ITGA3, ADAM9	323	89	13528	3.29412	1	0.356687	28.696
GOTERM_BP_FAT	GO:0001775	cell activation	1.69438	0.0202126	KLF6, IL6, EDN2, STAT5A, RELB, TLR1, IL7R, IL11, CD9, SAA1, ULBP2, HDAC9, LTB, ADAM9	323	287	13528	2.04304	1	0.36589	29.7438
GOTERM_BP_FAT	GO:0006865	amino acid transport	1.6913	0.0203565	SLC1A4, SLC38A2, SERINC1, SLC43A1, SLC7A5, SLC7A11, SLC7A7	323	90	13528	3.25752	1	0.364905	29.922
GOTERM_BP_FAT	GO:0042698	ovulation cycle	1.66733	0.0215116	INHBA, EREG, GNRH1, STAT5A, EDN2, TGFB2	323	67	13528	3.75066	1	0.375076	31.3368
GOTERM_BP_FAT	GO:0030166	proteoglycan biosynthetic process	1.63507	0.0231703	CSGALNACT1, NDST1, CHST8, CHST3	323	26	13528	6.44344	1	0.391382	33.3216
GOTERM_BP_FAT	GO:0009069	serine family amino acid metabolic process	1.63507	0.0231703	PDPR, CTH, PSAT1, CBS	323	26	13528	6.44344	1	0.391382	33.3216
GOTERM_BP_FAT	GO:0050795	regulation of behavior	1.62952	0.0234683	IL6, S1PR1, F3, EDN2, ITGA2	323	46	13528	4.55243	1	0.392253	33.6723
GOTERM_BP_FAT	GO:0006690	icosanoid metabolic process	1.59885	0.0251853	GGT5, PTGES, EDN2, CYP4F3, PLA2G4C	323	47	13528	4.45557	1	0.408097	35.6599
GOTERM_BP_FAT	GO:0019221	cytokine-mediated signaling pathway	1.59405	0.0254655	PLP2, KLF6, IL6, EREG, STAT5A, EDN2	323	70	13528	3.58992	1	0.408547	35.9788
GOTERM_BP_FAT	GO:0008361	regulation of cell size	1.58682	0.025893	INHBA, CTH, MAP1B, NPR1, HBEGF, EMP3, IL7R, CDH4, NTN1, EMP1, TGFB2	323	206	13528	2.23644	1	0.410789	36.4627
GOTERM_BP_FAT	GO:0050678	regulation of epithelial cell proliferation	1.57057	0.02688	LAMA1, EREG, EPGN, KRT4, LAMB1, TGFB2	323	71	13528	3.53935	1	0.413749	37.5666
GOTERM_BP_FAT	GO:0007567	parturition	1.56936	0.0269551	MAFF, CYP1A1, PLA2G4C	323	11	13528	11.4225	1	0.411726	37.6498
GOTERM_BP_FAT	GO:0009070	serine family amino acid biosynthetic process	1.56936	0.0269551	CTH, PSAT1, CBS	323	11	13528	11.4225	1	0.411726	37.6498
GOTERM_BP_FAT	GO:0051726	regulation of cell cycle	1.55903	0.0276041	LIF, INHBA, CYP1A1, EREG, EPGN, STAT5A, BTC, PIM1, ASNS, ID3, LTB, FOSL1, GADD45A, CITED2, TGFB2	323	331	13528	1.89799	1	0.410704	38.3649
GOTERM_BP_FAT	GO:0007173	epidermal growth factor receptor signaling pathway	1.54976	0.0281995	EREG, ARF4, HBEGF, AREG	323	28	13528	5.98319	1	0.414666	39.014
GOTERM_BP_FAT	GO:0009725	response to hormone stimulus	1.5268	0.0297305	IRS2, IL6, GNRH1, STAT5A, MAP1B, ITGA2, MFGE8, TIMP3, TGFB2, IGF1R, UGT1A6, EIF4EBP1, FABP3, HDAC9, FOSL1, ADAM9	323	367	13528	1.82593	1	0.428843	40.6539
GOTERM_BP_FAT	GO:0048514	blood vessel morphogenesis	1.52602	0.0297841	ZFP36L1, ACE, S1PR1, EREG, EPGN, CDH2, ARHGAP24, TNFAIP2, PLAU, CITED2, TGFB2	323	211	13528	2.18344	1	0.426613	40.7106
GOTERM_BP_FAT	GO:0007517	muscle organ development	1.52602	0.0297841	LIF, AEBP1, ACTC1, TAGLN, SVIL, MET, MYLPF, HBEGF, CHODL, FLNB, TGFB2	323	211	13528	2.18344	1	0.426613	40.7106
GOTERM_BP_FAT	GO:0015718	monocarboxylic acid transport	1.51171	0.0307812	SLC1A4, ACE, SLC16A8, ANXA1, FABP3	323	50	13528	4.18824	1	0.434536	41.7553
GOTERM_BP_FAT	GO:0014910	regulation of smooth muscle cell migration	1.49696	0.0318451	ACE, ITGA2, TRIB1	323	12	13528	10.4706	1	0.442921	42.8507
GOTERM_BP_FAT	GO:0033559	unsaturated fatty acid metabolic process	1.48418	0.0327963	GGT5, PTGES, EDN2, CYP4F3, PLA2G4C	323	51	13528	4.10611	1	0.447112	43.8137
GOTERM_BP_FAT	GO:0009719	response to endogenous stimulus	1.47766	0.0332924	IRS2, IL6, GNRH1, STAT5A, MAP1B, ITGA2, MFGE8, ASNS, TIMP3, TGFB2, UGT1A6, IGF1R, EIF4EBP1, FABP3, HDAC9, FOSL1, ADAM9	323	405	13528	1.75802	1	0.449353	44.3099
GOTERM_BP_FAT	GO:0010769	regulation of cell morphogenesis involved in differentiation	1.43873	0.0364141	MAP1B, TGFB1I1, CDH2, CDH4, NTN1, TGFB2	323	77	13528	3.26356	1	0.477019	47.3384
GOTERM_BP_FAT	GO:0045859	regulation of protein kinase activity	1.43256	0.0369354	EDN2, MET, PIM1, TRIB3, SDC4, TRIB1, TGFB2, TNFRSF10A, EREG, EPGN, SPRED2, DUSP8, GADD45A, ADAM9, CBS	323	345	13528	1.82097	1	0.479119	47.8289
GOTERM_BP_FAT	GO:0006518	peptide metabolic process	1.43118	0.0370528	GGT5, CTH, ACE, ECE1, TAPBP	323	53	13528	3.95117	1	0.474658	47.9387
GOTERM_BP_FAT	GO:0051043	regulation of membrane protein ectodomain proteolysis	1.43117	0.0370532	PACSIN3, TIMP3, ADAM9	323	13	13528	9.66516	1	0.471928	47.9391
GOTERM_BP_FAT	GO:0045995	regulation of embryonic development	1.43117	0.0370532	LAMA1, LAMA4, LAMA3	323	13	13528	9.66516	1	0.471928	47.9391
GOTERM_BP_FAT	GO:0010033	response to organic substance	1.41756	0.038233	CYP1B1, STAT5A, ASNS, TIMP3, TRIB1, TGFB2, IGF1R, UGT1A6, EIF4EBP1, CD44, CREB3L1, CASP1, FOSL1, ADAM9, IRS2, ACTC1, IL6, GNRH1, CYP1A1, MAP1B, ITGA2, MFGE8, FABP3, HSPB1, ID3, HDAC9	323	721	13528	1.51032	1	0.480028	49.0309
GOTERM_BP_FAT	GO:0030168	platelet activation	1.39963	0.039845	CD9, IL6, SAA1, IL11	323	32	13528	5.23529	1	0.491713	50.4878
GOTERM_BP_FAT	GO:0006955	immune response	1.39383	0.0403806	IL1R2, PXDN, TLR1, CXCL2, SUSD2, NLRX1, IL32, IL7R, TAPBP, LIF, IGF1R, SEMA7A, IL4R, CFH, RAET1L, LTB, EBI3, CRISP3, IL6, OLR1, RELB, MYLPF, C4BPB, CD55, ULBP2	323	690	13528	1.51748	1	0.490984	50.9632
GOTERM_BP_FAT	GO:0001666	response to hypoxia	1.38581	0.0411327	ACE, ECE1, CYP1A1, ITGA2, CASP1, PLAU, CITED2, TGFB2	323	134	13528	2.50044	1	0.494792	51.6233
GOTERM_BP_FAT	GO:0033135	regulation of peptidyl-serine phosphorylation	1.37098	0.0425618	LIF, IL6, IL11	323	14	13528	8.97479	1	0.501543	52.8548
GOTERM_BP_FAT	GO:0009309	amine biosynthetic process	1.3586	0.0437921	CTH, ASNS, PSAT1, SMS, CBS, TGFB2	323	81	13528	3.1024	1	0.509039	53.8913
GOTERM_BP_FAT	GO:0009612	response to mechanical stimulus	1.35649	0.0440061	MAP1B, ITGA2, FOSL1, TIMP3, LTB	323	56	13528	3.7395	1	0.508144	54.0693
GOTERM_BP_FAT	GO:0043549	regulation of kinase activity	1.32869	0.046915	EDN2, MET, PIM1, TRIB3, SDC4, TRIB1, TGFB2, TNFRSF10A, EREG, EPGN, SPRED2, DUSP8, GADD45A, ADAM9, CBS	323	357	13528	1.75976	1	0.525928	56.4266
GOTERM_BP_FAT	GO:0032880	regulation of protein localization	1.32845	0.0469402	IL6, SAA1, CDH2, CASP1, LTB, SRGN, ADAM9, TGFB2	323	138	13528	2.42796	1	0.523513	56.4465
GOTERM_BP_FAT	GO:0070813	hydrogen sulfide metabolic process	1.32753	0.0470401	CTH, CBS	323	2	13528	41.8824	1	0.521696	56.5254
GOTERM_BP_FAT	GO:0070814	hydrogen sulfide biosynthetic process	1.32753	0.0470401	CTH, CBS	323	2	13528	41.8824	1	0.521696	56.5254
GOTERM_BP_FAT	GO:0019344	cysteine biosynthetic process	1.32753	0.0470401	CTH, CBS	323	2	13528	41.8824	1	0.521696	56.5254
GOTERM_BP_FAT	GO:0015825	L-serine transport	1.32753	0.0470401	SLC1A4, SERINC1	323	2	13528	41.8824	1	0.521696	56.5254

## Sheet: Later stage
Table SIII-D. DAVID_GO_BP for DEGs in later stage of irradiation (P<0.05).
Category	Term		-log(pvalue)	PValue	Genes	List Total	Pop Hits	Pop Total	Fold Enrichment	Bonferroni	Benjamini	FDR
GOTERM_BP_FAT	GO:0001503	ossification	3.24138	0.00057361	PTHLH, CYP24A1, COL13A1, PTH1R, GABBR1, STC1, SPARC, IGFBP3, MMP13	221	115	13528	4.79056	0.57833	0.57833	0.949198
GOTERM_BP_FAT	GO:0060348	bone development	3.04856	0.000894204	PTHLH, CYP24A1, COL13A1, PTH1R, GABBR1, STC1, SPARC, IGFBP3, MMP13	221	123	13528	4.47898	0.739819	0.489921	1.47601
GOTERM_BP_FAT	GO:0001666	response to hypoxia	2.80844	0.0015544	PLAT, CA9, PDIA2, HMOX1, VEGFA, ARNT2, MMP13, MB, DDIT4	221	134	13528	4.1113	0.903787	0.541777	2.5526
GOTERM_BP_FAT	GO:0070482	response to oxygen levels	2.66872	0.00214425	PLAT, CA9, PDIA2, HMOX1, VEGFA, ARNT2, MMP13, MB, DDIT4	221	141	13528	3.90719	0.960465	0.554091	3.50511
GOTERM_BP_FAT	GO:0010506	regulation of autophagy	2.42221	0.00378263	CLN3, NPC1, ULK1	221	6	13528	30.6063	0.996666	0.680414	6.10511
GOTERM_BP_FAT	GO:0002274	myeloid leukocyte activation	2.18642	0.00650996	LAT, DHRS2, LAT2, MYO1F, NDRG1	221	46	13528	6.65355	0.999946	0.754441	10.2877
GOTERM_BP_FAT	GO:0045576	mast cell activation	2.16047	0.00691087	LAT, LAT2, NDRG1	221	8	13528	22.9548	0.999971	0.728724	10.8876
GOTERM_BP_FAT	GO:0001501	skeletal system development	1.81917	0.0151645	PTHLH, CYP24A1, DLX1, COL13A1, PTH1R, COL1A2, GABBR1, TP63, STC1, SPARC, IGFBP3, MMP13	221	319	13528	2.30267	1	0.922329	22.4305
GOTERM_BP_FAT	GO:0042573	retinoic acid metabolic process	1.80666	0.0156077	ALDH1A2, DHRS9, CYP26A1	221	12	13528	15.3032	1	0.906283	23.0087
GOTERM_BP_FAT	GO:0043299	leukocyte degranulation	1.80666	0.0156077	LAT, LAT2, MYO1F	221	12	13528	15.3032	1	0.906283	23.0087
GOTERM_BP_FAT	GO:0008630	DNA damage response, signal transduction resulting in induction of apoptosis	1.79135	0.0161677	BBC3, HMOX1, TP63, IFI16	221	33	13528	7.41972	1	0.892483	23.7335
GOTERM_BP_FAT	GO:0006775	fat-soluble vitamin metabolic process	1.79135	0.0161677	ALDH1A2, CYP24A1, DHRS9, CYP26A1	221	33	13528	7.41972	1	0.892483	23.7335
GOTERM_BP_FAT	GO:0042592	homeostatic process	1.68574	0.0206185	CLN3, SLC12A7, KCNMB4, SCN1A, PDIA2, PTH1R, PRDX4, SLC7A8, PRDX5, CCNL2, TIMP1, DFNB31, PTHLH, KCNN4, NPC1, NPC2, SLC4A11, HMOX1, VEGFA, STC1, MB	221	751	13528	1.71167	1	0.926681	29.2702
GOTERM_BP_FAT	GO:0002444	myeloid leukocyte mediated immunity	1.61889	0.0240499	LAT, LAT2, MYO1F	221	15	13528	12.2425	1	0.940291	33.2786
GOTERM_BP_FAT	GO:0007229	integrin-mediated signaling pathway	1.56704	0.0270993	LAT, ITGB4, ADAM33, COL16A1, CEACAM1	221	70	13528	4.37233	1	0.947837	36.6606
GOTERM_BP_FAT	GO:0006820	anion transport	1.53175	0.0293932	GABRE, SLC12A7, SLC26A6, FXYD3, SLC17A5, SLC4A11, SLC4A3	221	143	13528	2.99642	1	0.94988	39.0977
GOTERM_BP_FAT	GO:0006766	vitamin metabolic process	1.47153	0.0337656	ALDH1A2, CYP24A1, KYNU, DHRS9, CYP26A1	221	75	13528	4.08084	1	0.96048	43.5011
GOTERM_BP_FAT	GO:0045055	regulated secretory pathway	1.4692	0.0339471	LAT, LAT2, MYO1F	221	18	13528	10.2021	1	0.952996	43.6772
GOTERM_BP_FAT	GO:0002275	myeloid cell activation during immune response	1.4692	0.0339471	LAT, LAT2, MYO1F	221	18	13528	10.2021	1	0.952996	43.6772
GOTERM_BP_FAT	GO:0007242	intracellular signaling cascade	1.46883	0.0339757	CXCL1, CYP24A1, EFNA1, PTH1R, PI4KAP2, PRDX4, IQGAP3, TP63, PRKCSH, ALDH1A2, HMOX1, ARL14, KDM3A, HIST1H4H, FYB, CYP26A1, NPR2, IFI16, TMPRSS6, TYK2, PTHLH, LAT, LAT2, ULK1, BBC3, CD81, COL1A2, CHN1, ARL4D, DUSP6	221	1256	13528	1.46209	1	0.944431	43.7049
GOTERM_BP_FAT	GO:0031669	cellular response to nutrient levels	1.46242	0.0344807	CLN3, CYP24A1, ATG9B, HMOX1	221	44	13528	5.56479	1	0.937926	44.1921
GOTERM_BP_FAT	GO:0031667	response to nutrient levels	1.37393	0.0422741	CLN3, ALDH1A2, CYP24A1, A2M, ATG9B, KYNU, HMOX1, STC1	221	197	13528	2.48579	1	0.95475	51.2258
GOTERM_BP_FAT	GO:0007398	ectoderm development	1.35441	0.0442168	PTHLH, KRT6A, COL17A1, KRT5, COL7A1, COL1A2, TP63, SNAI1	221	199	13528	2.46081	1	0.954668	52.8444
GOTERM_BP_FAT	GO:0034101	erythrocyte homeostasis	1.34443	0.0452446	HMOX1, VEGFA, MB, TIMP1	221	49	13528	4.99695	1	0.951667	53.6803
GOTERM_BP_FAT	GO:0006325	chromatin organization	1.34258	0.0454382	HIST1H2AC, TSPYL2, CDYL2, EZH1, HIST1H3A, KDM3A, HDAC11, PADI4, SMARCA2, TSSK6, KDM6B, HIST1H4H	221	378	13528	1.94326	1	0.945857	53.8362
GOTERM_BP_FAT	GO:0015718	monocarboxylic acid transport	1.32262	0.0475749	SLC16A2, SLC26A6, SLC17A5, ABCC3	221	50	13528	4.89701	1	0.946836	55.524

## Sheet: Magenta
Table SIII-E. DAVID_GO_BP for DEGs in magenta modules (P<0.05).
Category	Term	Count	%	PValue	Genes	List Total	Pop Hits	Pop Total	Fold Enrichment	Bonferroni	Benjamini	FDR
GOTERM_BP_FAT	GO:0051603~proteolysis involved in cellular protein catabolic process	17	9.55056	0.000288843	TBL1XR1, IDE, HERC6, SKP2, SOCS4, ATE1, ZYG11A, UBR7, RNF2, KLHL13, USP37, SPOPL, FBXO21, TRIP12, USP45, FBXL17, USP13	135	600	13528	2.83921	0.236702	0.236702	0.451496
GOTERM_BP_FAT	GO:0044257~cellular protein catabolic process	17	9.55056	0.000305361	TBL1XR1, IDE, HERC6, SKP2, SOCS4, ATE1, ZYG11A, UBR7, RNF2, KLHL13, USP37, SPOPL, FBXO21, TRIP12, USP45, FBXL17, USP13	135	603	13528	2.82508	0.248404	0.133053	0.477258
GOTERM_BP_FAT	GO:0030163~protein catabolic process	17	9.55056	0.000430267	TBL1XR1, IDE, HERC6, SKP2, SOCS4, ATE1, ZYG11A, UBR7, RNF2, KLHL13, USP37, SPOPL, FBXO21, TRIP12, USP45, FBXL17, USP13	135	622	13528	2.73879	0.331278	0.125523	0.671863
GOTERM_BP_FAT	GO:0019941~modification-dependent protein catabolic process	16	8.98876	0.000557207	TBL1XR1, HERC6, SKP2, SOCS4, ATE1, ZYG11A, UBR7, RNF2, KLHL13, USP37, SPOPL, FBXO21, TRIP12, USP45, FBXL17, USP13	135	574	13528	2.79324	0.406153	0.122153	0.869272
GOTERM_BP_FAT	GO:0043632~modification-dependent macromolecule catabolic process	16	8.98876	0.000557207	TBL1XR1, HERC6, SKP2, SOCS4, ATE1, ZYG11A, UBR7, RNF2, KLHL13, USP37, SPOPL, FBXO21, TRIP12, USP45, FBXL17, USP13	135	574	13528	2.79324	0.406153	0.122153	0.869272
GOTERM_BP_FAT	GO:0044265~cellular macromolecule catabolic process	18	10.1124	0.000808571	TBL1XR1, LDLR, IDE, HERC6, SKP2, SOCS4, ATE1, ZYG11A, UBR7, RNF2, KLHL13, USP37, SPOPL, FBXO21, TRIP12, USP45, FBXL17, USP13	135	725	13528	2.48791	0.530609	0.140379	1.25909
GOTERM_BP_FAT	GO:0045935~positive regulation of nucleobase, nucleoside, nucleotide and nucleic acid metabolic process	16	8.98876	0.00130033	TBL1XR1, HOXA13, CREBBP, TEAD1, KITLG, EHF, ARID1B, CITED4, AHR, POT1, EP300, NCOA2, ZNF148, H2AFX, MKL2, NSD1	135	624	13528	2.56942	0.703765	0.183532	2.01758
GOTERM_BP_FAT	GO:0051173~positive regulation of nitrogen compound metabolic process	16	8.98876	0.00177361	TBL1XR1, HOXA13, CREBBP, TEAD1, KITLG, EHF, ARID1B, CITED4, AHR, POT1, EP300, NCOA2, ZNF148, H2AFX, MKL2, NSD1	135	644	13528	2.48963	0.809823	0.211099	2.74241
GOTERM_BP_FAT	GO:0009057~macromolecule catabolic process	18	10.1124	0.00181323	TBL1XR1, LDLR, IDE, HERC6, SKP2, SOCS4, ATE1, ZYG11A, UBR7, RNF2, KLHL13, USP37, SPOPL, FBXO21, TRIP12, USP45, FBXL17, USP13	135	781	13528	2.30952	0.816751	0.191127	2.80285
GOTERM_BP_FAT	GO:0051276~chromosome organization	13	7.30337	0.00316085	TBL1XR1, HIST1H2BN, EP300, TEX15, BRPF3, HIST1H2BF, RNF2, CREBBP, ASH1L, H2AFX, ARID1B, NSD1, POT1	135	485	13528	2.68597	0.948185	0.280283	4.83815
GOTERM_BP_FAT	GO:0006325~chromatin organization	11	6.17978	0.00436027	TBL1XR1, HIST1H2BN, EP300, BRPF3, HIST1H2BF, RNF2, CREBBP, ASH1L, H2AFX, ARID1B, NSD1	135	378	13528	2.91609	0.98319	0.335405	6.616
GOTERM_BP_FAT	GO:0010557~positive regulation of macromolecule biosynthetic process	15	8.42697	0.00534573	TBL1XR1, HOXA13, CREBBP, TEAD1, KITLG, EHF, ARID1B, CITED4, AHR, POT1, EP300, NCOA2, ZNF148, MKL2, NSD1	135	654	13528	2.29834	0.99334	0.365937	8.05338
GOTERM_BP_FAT	GO:0007242~intracellular signaling cascade	23	12.9213	0.00587957	ADCY1, PTGER4, RREB1, ROCK2, SOCS4, AKAP11, ARHGAP29, PDZD8, PRKAR2A, NCOA2, ARHGAP5, RASL11A, EIF4EBP2, PRLR, RASGRF1, HRH2, MAP3K2, SOS1, PRKAR1A, CHRNA7, GNB4, H2AFX, ERC1	135	1256	13528	1.83501	0.995969	0.368381	8.82335
GOTERM_BP_FAT	GO:0045893~positive regulation of transcription, DNA-dependent	12	6.74157	0.0078036	TBL1XR1, NCOA2, EP300, HOXA13, ZNF148, CREBBP, TEAD1, EHF, MKL2, ARID1B, NSD1, AHR	135	477	13528	2.52094	0.999341	0.430764	11.5487
GOTERM_BP_FAT	GO:0031328~positive regulation of cellular biosynthetic process	15	8.42697	0.007932	TBL1XR1, HOXA13, CREBBP, TEAD1, KITLG, EHF, ARID1B, CITED4, AHR, POT1, EP300, NCOA2, ZNF148, MKL2, NSD1	135	685	13528	2.19432	0.999416	0.412487	11.7278
GOTERM_BP_FAT	GO:0051254~positive regulation of RNA metabolic process	12	6.74157	0.00828249	TBL1XR1, NCOA2, EP300, HOXA13, ZNF148, CREBBP, TEAD1, EHF, MKL2, ARID1B, NSD1, AHR	135	481	13528	2.49998	0.99958	0.404543	12.215
GOTERM_BP_FAT	GO:0009891~positive regulation of biosynthetic process	15	8.42697	0.00895182	TBL1XR1, HOXA13, CREBBP, TEAD1, KITLG, EHF, ARID1B, CITED4, AHR, POT1, EP300, NCOA2, ZNF148, MKL2, NSD1	135	695	13528	2.16275	0.999777	0.408727	13.1385
GOTERM_BP_FAT	GO:0051347~positive regulation of transferase activity	8	4.49438	0.00991909	ADCY1, PRKAR2A, PRLR, MAP3K2, PRKAR1A, KITLG, CHRNA7, POT1	135	240	13528	3.34025	0.99991	0.422053	14.4571
GOTERM_BP_FAT	GO:0045941~positive regulation of transcription	13	7.30337	0.0101867	TBL1XR1, NCOA2, EP300, HOXA13, ZNF148, CREBBP, TEAD1, EHF, MKL2, ARID1B, NSD1, CITED4, AHR	135	564	13528	2.30975	0.99993	0.412485	14.8185
GOTERM_BP_FAT	GO:0034199~activation of protein kinase A activity	3	1.68539	0.0120162	ADCY1, PRKAR2A, PRKAR1A	135	17	13528	17.6837	0.999988	0.448386	17.2517
GOTERM_BP_FAT	GO:0010628~positive regulation of gene expression	13	7.30337	0.0126686	TBL1XR1, NCOA2, EP300, HOXA13, ZNF148, CREBBP, TEAD1, EHF, MKL2, ARID1B, NSD1, CITED4, AHR	135	581	13528	2.24216	0.999993	0.449011	18.1034
GOTERM_BP_FAT	GO:0006357~regulation of transcription from RNA polymerase II promoter	15	8.42697	0.0129302	TBL1XR1, HMX1, HOXA13, CREBBP, TEAD1, AHR, EP300, NCOA2, ZNF148, RNF2, PRKAR1A, MKL2, NSD1, TCF12, TWIST2	135	727	13528	2.06755	0.999995	0.439798	18.4427
GOTERM_BP_FAT	GO:0009755~hormone-mediated signaling	4	2.24719	0.0147511	ADCY1, PRKAR2A, PRKAR1A, GNB4	135	52	13528	7.70826	0.999999	0.468254	20.7677
GOTERM_BP_FAT	GO:0016568~chromatin modification	8	4.49438	0.0192837	TBL1XR1, EP300, BRPF3, RNF2, CREBBP, ASH1L, ARID1B, NSD1	135	274	13528	2.92576	1	0.546873	26.2889
GOTERM_BP_FAT	GO:0010604~positive regulation of macromolecule metabolic process	16	8.98876	0.0224349	TBL1XR1, HOXA13, CREBBP, TEAD1, KITLG, EHF, ARID1B, CITED4, AHR, POT1, EP300, NCOA2, ZNF148, H2AFX, MKL2, NSD1	135	857	13528	1.87085	1	0.586865	29.9128
GOTERM_BP_FAT	GO:0045860~positive regulation of protein kinase activity	7	3.93258	0.0235782	ADCY1, PRKAR2A, PRLR, MAP3K2, PRKAR1A, KITLG, CHRNA7	135	223	13528	3.14552	1	0.590324	31.1859
GOTERM_BP_FAT	GO:0033674~positive regulation of kinase activity	7	3.93258	0.0274145	ADCY1, PRKAR2A, PRLR, MAP3K2, PRKAR1A, KITLG, CHRNA7	135	231	13528	3.03659	1	0.631986	35.3012
GOTERM_BP_FAT	GO:0018394~peptidyl-lysine acetylation	2	1.1236	0.0294249	EP300, CREBBP	135	3	13528	66.8049	1	0.644513	37.3646
GOTERM_BP_FAT	GO:0018076~N-terminal peptidyl-lysine acetylation	2	1.1236	0.0294249	EP300, CREBBP	135	3	13528	66.8049	1	0.644513	37.3646
GOTERM_BP_FAT	GO:0044093~positive regulation of molecular function	12	6.74157	0.0310629	ADCY1, PRKAR2A, EP300, PRLR, EPB41, MAP3K2, RASGRF1, PRKAR1A, KITLG, CHRNA7, ERC1, POT1	135	586	13528	2.05203	1	0.651365	39
GOTERM_BP_FAT	GO:0006508~proteolysis	18	10.1124	0.0311559	TBL1XR1, ADAMTS15, IDE, HERC6, SKP2, SOCS4, ATE1, ZYG11A, UBR7, RNF2, KLHL13, USP37, SPOPL, FBXO21, FBXL17, TRIP12, USP45, USP13	135	1054	13528	1.71132	1	0.639582	39.0918
GOTERM_BP_FAT	GO:0045944~positive regulation of transcription from RNA polymerase II promoter	9	5.05618	0.0312738	TBL1XR1, NCOA2, EP300, HOXA13, ZNF148, CREBBP, TEAD1, MKL2, AHR	135	371	13528	2.43091	1	0.628523	39.2077
GOTERM_BP_FAT	GO:0006468~protein amino acid phosphorylation	13	7.30337	0.0329447	ROCK2, TAOK1, ADRBK2, UHMK1, PRLR, MAP3K2, SCYL2, EPHA8, PDGFRB, CHRNA7, YES1, ERC1, MYLK	135	667	13528	1.95307	1	0.635923	40.8296
GOTERM_BP_FAT	GO:0016570~histone modification	5	2.80899	0.0330194	EP300, BRPF3, RNF2, CREBBP, NSD1	135	122	13528	4.10686	1	0.625091	40.9011
GOTERM_BP_FAT	GO:0006511~ubiquitin-dependent protein catabolic process	7	3.93258	0.0333348	TBL1XR1, SKP2, USP37, FBXO21, USP45, USP13, ATE1	135	242	13528	2.89856	1	0.617331	41.2024
GOTERM_BP_FAT	GO:0016569~covalent chromatin modification	5	2.80899	0.0365238	EP300, BRPF3, RNF2, CREBBP, NSD1	135	126	13528	3.97648	1	0.640559	44.1684
GOTERM_BP_FAT	GO:0006350~transcription	30	16.8539	0.0368053	HMX1, HOXA13, ZNF532, EHF, CITED4, CNOT6, MIER1, ZNF148, ZNF696, MKL2, TWIST2, ASXL2, TBL1XR1, RREB1, CREBBP, ZNF260, ZNF770, AFF4, TEAD1, ARID1B, AHR, ZNF628, NCOA2, EP300, RNF2, ASH1L, MGA, ZNF414, NSD1, TCF12	135	2101	13528	1.43085	1	0.632774	44.4234
GOTERM_BP_FAT	GO:0006104~succinyl-CoA metabolic process	2	1.1236	0.039041	SUCLG2, ACOT4	135	4	13528	50.1037	1	0.644527	46.4101
GOTERM_BP_FAT	GO:0016055~Wnt receptor signaling pathway	5	2.80899	0.0431597	TBL1XR1, WNT7B, NKD1, STRN, BCL9	135	133	13528	3.7672	1	0.67205	49.8971
GOTERM_BP_FAT	GO:0032870~cellular response to hormone stimulus	5	2.80899	0.0431597	ADCY1, PRKAR2A, EIF4EBP2, PRKAR1A, GNB4	135	133	13528	3.7672	1	0.67205	49.8971

## Sheet: Cyan
Table SIII-F. DAVID_GO_BP for DEGs in cyan modules (P<0.05).
Category	Term		-log(pvalue)	PValue	Genes	List Total	Pop Hits	Pop Total	Fold Enrichment	Bonferroni	Benjamini	FDR
GOTERM_BP_FAT	GO:0001666	response to hypoxia	3.79721	0.00015951	PLAT, CA9, PDIA2, HMOX1, VEGFA, ARNT2, MMP13, MB, DDIT4	157	134	13528	5.78724	0.181303	0.181303	0.258972
GOTERM_BP_FAT	GO:0001503	ossification	3.43578	0.000366622	PTHLH, CYP24A1, COL13A1, PTH1R, GABBR1, STC1, IGFBP3, MMP13	157	115	13528	5.99413	0.368608	0.142107	0.594289
GOTERM_BP_FAT	GO:0006775	fat-soluble vitamin metabolic process	2.19592	0.00636914	ALDH1A2, CYP24A1, DHRS9, CYP26A1	157	33	13528	10.4443	0.999669	0.68166	9.86511
GOTERM_BP_FAT	GO:0008630	DNA damage response, signal transduction resulting in induction of apoptosis	2.19592	0.00636914	BBC3, HMOX1, TP63, IFI16	157	33	13528	10.4443	0.999669	0.68166	9.86511
GOTERM_BP_FAT	GO:0031667	response to nutrient levels	2.10443	0.00786274	CLN3, ALDH1A2, CYP24A1, A2M, ATG9B, KYNU, HMOX1, STC1	157	197	13528	3.49911	0.99995	0.709849	12.0424
GOTERM_BP_FAT	GO:0042573	retinoic acid metabolic process	2.09239	0.0080837	ALDH1A2, DHRS9, CYP26A1	157	12	13528	21.5414	0.999962	0.677259	12.3603
GOTERM_BP_FAT	GO:0007398	ectoderm development	2.08219	0.00827588	PTHLH, KRT6A, COL17A1, KRT5, COL7A1, COL1A2, TP63, SNAI1	157	199	13528	3.46394	0.99997	0.647292	12.6359
GOTERM_BP_FAT	GO:0007229	integrin-mediated signaling pathway	2.06281	0.0086534	LAT, ITGB4, ADAM33, COL16A1, CEACAM1	157	70	13528	6.15469	0.999982	0.628713	13.175
GOTERM_BP_FAT	GO:0006766	vitamin metabolic process	1.95955	0.0109763	ALDH1A2, CYP24A1, KYNU, DHRS9, CYP26A1	157	75	13528	5.74437	0.999999	0.684426	16.4235
GOTERM_BP_FAT	GO:0042771	DNA damage response, signal transduction by p53 class mediator resulting in induction of apoptosis	1.90057	0.0125727	BBC3, TP63, IFI16	157	15	13528	17.2331	1	0.704909	18.5896
GOTERM_BP_FAT	GO:0009991	response to extracellular stimulus	1.85825	0.0138595	CLN3, ALDH1A2, CYP24A1, A2M, ATG9B, KYNU, HMOX1, STC1	157	220	13528	3.13329	1	0.713522	20.2971
GOTERM_BP_FAT	GO:0002274	myeloid leukocyte activation	1.7987	0.0158965	LAT, DHRS2, MYO1F, NDRG1	157	46	13528	7.49266	1	0.715179	22.9316
GOTERM_BP_FAT	GO:0034101	erythrocyte homeostasis	1.72542	0.0188181	HMOX1, VEGFA, MB, TIMP1	157	49	13528	7.03393	1	0.753733	26.5678
GOTERM_BP_FAT	GO:0008544	epidermis development	1.70582	0.0196871	PTHLH, COL17A1, KRT5, COL7A1, COL1A2, TP63, SNAI1	157	184	13528	3.27804	1	0.74973	27.6178
GOTERM_BP_FAT	GO:0031330	negative regulation of cellular catabolic process	1.65932	0.0219116	CLN3, NPC1, TIMP1	157	20	13528	12.9248	1	0.768285	30.2421
GOTERM_BP_FAT	GO:0030099	myeloid cell differentiation	1.64757	0.022513	DHRS2, VEGFA, IFI16, MB, TIMP1	157	93	13528	4.63256	1	0.76014	30.936
GOTERM_BP_FAT	GO:0007584	response to nutrient	1.63777	0.0230269	ALDH1A2, CYP24A1, A2M, KYNU, HMOX1, STC1	157	140	13528	3.69281	1	0.751202	31.5238
GOTERM_BP_FAT	GO:0030162	regulation of proteolysis	1.63553	0.0231457	CLN3, A2M, PLAUR, TIMP1	157	53	13528	6.50306	1	0.736792	31.659
GOTERM_BP_FAT	GO:0008629	induction of apoptosis by intracellular signals	1.61431	0.0243049	BBC3, HMOX1, TP63, IFI16	157	54	13528	6.38264	1	0.738551	32.9654
GOTERM_BP_FAT	GO:0006952	defense response	1.59136	0.0256236	CXCL1, A2M, KYNU, S100A8, C3, S100A9, MYO1F, CCNL2, KCNN4, IL23A, HMOX1, MST1R, MX2, KDM6B	157	615	13528	1.96149	1	0.742384	34.4231
GOTERM_BP_FAT	GO:0045861	negative regulation of proteolysis	1.58097	0.0262439	CLN3, A2M, TIMP1	157	22	13528	11.7499	1	0.736572	35.0984
GOTERM_BP_FAT	GO:0042592	homeostatic process	1.57217	0.0267812	CLN3, SLC12A7, SCN1A, PDIA2, PTH1R, SLC7A8, CCNL2, TIMP1, PTHLH, KCNN4, NPC1, SLC4A11, HMOX1, VEGFA, STC1, MB	157	751	13528	1.83575	1	0.729988	35.6781
GOTERM_BP_FAT	GO:0016101	diterpenoid metabolic process	1.54471	0.0285291	ALDH1A2, DHRS9, CYP26A1	157	23	13528	11.239	1	0.739274	37.5304
GOTERM_BP_FAT	GO:0006776	vitamin A metabolic process	1.54471	0.0285291	ALDH1A2, DHRS9, CYP26A1	157	23	13528	11.239	1	0.739274	37.5304
GOTERM_BP_FAT	GO:0009954	proximal/distal pattern formation	1.54471	0.0285291	ALDH1A2, DLX1, TP63	157	23	13528	11.239	1	0.739274	37.5304
GOTERM_BP_FAT	GO:0001523	retinoid metabolic process	1.54471	0.0285291	ALDH1A2, DHRS9, CYP26A1	157	23	13528	11.239	1	0.739274	37.5304
GOTERM_BP_FAT	GO:0034754	cellular hormone metabolic process	1.51479	0.0305639	ALDH1A2, DHRS2, DHRS9, CYP26A1	157	59	13528	5.84174	1	0.75097	39.6238
GOTERM_BP_FAT	GO:0007242	intracellular signaling cascade	1.50683	0.0311296	FYB, CXCL1, CYP24A1, EFNA1, PTH1R, IQGAP3, CYP26A1, TP63, NPR2, IFI16, PRKCSH, PTHLH, TYK2, LAT, ALDH1A2, BBC3, HMOX1, ARL14, COL1A2, KDM3A, ARL4D, DUSP6, HIST1H4H	157	1256	13528	1.57787	1	0.745252	40.1938
GOTERM_BP_FAT	GO:0006721	terpenoid metabolic process	1.4772	0.0333275	ALDH1A2, DHRS9, CYP26A1	157	25	13528	10.3399	1	0.757519	42.3614
GOTERM_BP_FAT	GO:0048730	epidermis morphogenesis	1.4772	0.0333275	COL1A2, TP63, SNAI1	157	25	13528	10.3399	1	0.757519	42.3614
GOTERM_BP_FAT	GO:0010507	negative regulation of autophagy	1.46597	0.0342	CLN3, NPC1	157	3	13528	57.4437	1	0.755284	43.2014
GOTERM_BP_FAT	GO:0016242	negative regulation of macroautophagy	1.46597	0.0342	CLN3, NPC1	157	3	13528	57.4437	1	0.755284	43.2014
GOTERM_BP_FAT	GO:0030330	DNA damage response, signal transduction by p53 class mediator	1.44567	0.0358365	BBC3, TP63, IFI16	157	26	13528	9.94219	1	0.760721	44.7457
GOTERM_BP_FAT	GO:0031668	cellular response to extracellular stimulus	1.42495	0.0375884	CLN3, CYP24A1, ATG9B, HMOX1	157	64	13528	5.38535	1	0.766809	46.3553
GOTERM_BP_FAT	GO:0009110	vitamin biosynthetic process	1.38653	0.0410644	ALDH1A2, KYNU, DHRS9	157	28	13528	9.23203	1	0.787014	49.4195
GOTERM_BP_FAT	GO:0035238	vitamin A biosynthetic process	1.34352	0.0453397	ALDH1A2, DHRS9	157	4	13528	43.0828	1	0.810324	52.9631
GOTERM_BP_FAT	GO:0043589	skin morphogenesis	1.34352	0.0453397	COL1A2, TP63	157	4	13528	43.0828	1	0.810324	52.9631
GOTERM_BP_FAT	GO:0016241	regulation of macroautophagy	1.34352	0.0453397	CLN3, NPC1	157	4	13528	43.0828	1	0.810324	52.9631
GOTERM_BP_FAT	GO:0042905	9-cis-retinoic acid metabolic process	1.34352	0.0453397	ALDH1A2, DHRS9	157	4	13528	43.0828	1	0.810324	52.9631
GOTERM_BP_FAT	GO:0042904	9-cis-retinoic acid biosynthetic process	1.34352	0.0453397	ALDH1A2, DHRS9	157	4	13528	43.0828	1	0.810324	52.9631
GOTERM_BP_FAT	GO:0060429	epithelium development	1.32036	0.0478237	PTHLH, ALDH1A2, CA9, KRT5, VEGFA, DHRS9, TP63	157	227	13528	2.65709	1	0.818593	54.9136
